1 **Genetic and molecular mechanism for distinct clinical**  
2 **phenotypes conveyed by allelic truncating mutations**  
3 **implicated in *FBNI***

4  
5 **Mao Lin<sup>a,b\*</sup>, Zhenlei Liu<sup>c,d\*</sup>, Gang Liu<sup>a,c</sup>, Sen Zhao<sup>a,c</sup>, Chao Li<sup>e</sup>, Weisheng**  
6 **Chen<sup>a,b</sup>, Zeynep Coban Akdemir<sup>f</sup>, Jiachen Lin<sup>a,b</sup>, Xiaofei Song<sup>f</sup>, Shengru**  
7 **Wang<sup>a,c</sup>, Qiming Xu<sup>c</sup>, Yanxue Zhao<sup>a</sup>, Lianlei Wang<sup>a,b</sup>, Yuanqiang Zhang<sup>a,b</sup>,**  
8 **Zihui Yan<sup>a,b</sup>, Sen Liu<sup>a,c</sup>, Jiaqi Liu<sup>c,g</sup>, Yixin Chen<sup>h</sup>, Xu Yang<sup>a</sup>, Tianshu Sun<sup>i</sup>,**  
9 **Xin-Zhuang Yang<sup>i</sup>, Yuchen Niu<sup>i</sup>, Xiaoxin Li<sup>i</sup>, Wesley You<sup>j</sup>, Bintao Qiu<sup>i</sup>, Chen**  
10 **Ding<sup>e</sup>, Pengfei Liu<sup>f,k</sup>, Shuyang Zhang<sup>cl</sup>, Claudia M. B. Carvalho<sup>f</sup>, Jennifer E.**  
11 **Posey<sup>f</sup>, Guixing Qiu<sup>a,c,m</sup>, James R. Lupski<sup>f,n,o,p</sup>, Zhihong Wu<sup>c,i,m#</sup>, Jianguo**  
12 **Zhang<sup>a,c,m#</sup>, Nan Wu<sup>a,c,f,m#</sup>, on behalf of the Deciphering Disorders Involving**  
13 **Scoliosis and COMorbidities (DISCO) study**

14 <sup>a</sup> *Department of Orthopedic Surgery, Peking Union Medical College Hospital,*  
15 *Peking Union Medical College and Chinese Academy of Medical Sciences, Beijing*  
16 *100730, China*

17 <sup>b</sup> *Graduate School of Peking Union Medical College, Chinese Academy of Medical*  
18 *Sciences, Beijing 100005, China*

19 <sup>c</sup> *Beijing Key Laboratory for Genetic Research of Skeletal Deformity, Beijing 100730,*  
20 *China*

21 <sup>d</sup> *Department of Neurosurgery, Xuanwu Hospital, Capital Medical University,*  
22 *Beijing 100053, China*

23 <sup>e</sup> *College of Life and Health Sciences, Northeastern University, ShenYang, LiaoNing,*  
24 *110819, China*

25 <sup>f</sup> *Department of Molecular and Human Genetics, Baylor College of Medicine,*  
26 *Houston, TX 77030, USA*

27 <sup>g</sup> *Department of Breast Surgical Oncology, National Cancer Center /National*  
28 *Clinical Research Center for Cancer/Cancer Hospital, Chinese Academy of Medical*  
29 *Sciences and Peking Union Medical College, Beijing 100021, China*

30 <sup>h</sup> *Department of Cardiovascular Surgery, Fuwai Hospital, National Center for*  
31 *Cardiovascular Diseases, Chinese Academy of Medical Sciences and Peking Union*  
32 *Medical College, Beijing 100073, China*

33 <sup>i</sup> *Medical Research Center & Department of Central Laboratory, Peking Union*  
34 *Medical College Hospital, Peking Union Medical College and Chinese Academy of*  
35 *Medical Sciences, Beijing 100730, China*

36 <sup>j</sup> *Amherst College, 220 South Pleasant Street, Amherst, MA 01002, USA*

37 <sup>k</sup> *Baylor Genetics Laboratory, Houston, Texas 77021, USA*

38 <sup>l</sup> *Department of Cardiology, Peking Union Medical College Hospital, Peking Union*

39 *Medical College and Chinese Academy of Medical Sciences, No. 1 Shuaifuyuan,*  
40 *Beijing 100730, China*

41 <sup>m</sup> *Medical Research Center of Orthopedics, Chinese Academy of Medical Sciences,*  
42 *Beijing 100730, China*

43 <sup>n</sup> *Departments of Pediatrics, Baylor College of Medicine, Houston, Texas 77030,*  
44 *USA*

45 <sup>o</sup> *Texas Children's Hospital, Houston, Texas 77030, USA*

46 <sup>p</sup> *Human Genome Sequencing Center, Baylor College of Medicine, Houston 77030,*  
47 *Texas, USA*

48

49 <sup>#</sup> Corresponding authors:

50 Nan Wu, MD, E-mail: [dr.wunan@pumch.cn](mailto:dr.wunan@pumch.cn);

51 Jianguo Zhang MD, E-mail: [jgzhang\\_pumch@yahoo.com](mailto:jgzhang_pumch@yahoo.com);

52 Zhihong Wu, MD, E-mail: [orthoscience@126.com](mailto:orthoscience@126.com).

53

54 \*These authors have contributed equally to this study

55

56

57 **Abstract**

58       The molecular and genetic mechanisms by which different single nucleotide  
59 variant (SNV) alleles in specific genes, or at the same genetic locus, bring about  
60 distinct disease phenotypes often remain unclear. Allelic truncating mutations of  
61 *fibrillin-1(FBNI)* cause either classical Marfan syndrome (MFS) or a more severe  
62 phenotype associated with Marfanoid-progeroid-lipodystrophy syndrome (MPLS). A  
63 total of three Marfan syndrome/Marfanoid patients (2 singletons and 1  
64 parent-offspring trio) were recruited. Targeted next-generation sequencing was  
65 performed on all the participants. We analyzed the molecular diagnosis, patient  
66 clinical features, and the potential molecular mechanism involved in the MPLS  
67 subject in our cohort. We investigated a small cohort, consisting of two classical MFS  
68 and one MPLS patient from China, whose clinical presentation included scoliosis  
69 potentially requiring surgical intervention. We provide evidence that most nonsense  
70 and frameshift mutations lead to *FBNI* null alleles due to mutant mRNA transcript  
71 degradation. In contrast, the more severe disease phenotype, MPLS, is caused by  
72 mutant mRNAs that are predicted to escape the nonsense mediated decay (NMD)  
73 surveillance pathway, making a mutant protein that exerts a dominant negative

74 interference effect to *FBNI* thus generating a gain-of-function (GoF) rather than a  
75 loss-of-function (LoF) allele as in MFS. Overall, we provide direct evidence that a  
76 dominant negative interaction of *FBNI* potentially explains the distinct clinical  
77 phenotype in MPLS patients through genetic and functional analysis of the first  
78 Chinese patient with MPLS. Moreover, our study expands the mutation spectrum of  
79 *FBNI* and highlights the potential molecular mechanism for MPLS patients.

#### 80 **Keywords**

81 *FBNI*, Marfan syndrome (MFS), Marfanoid-progeroid-lipodystrophy syndrome  
82 (MPLS), Targeted next-generation sequencing, Dominant negative mechanism

83

84

85

86 Marfan syndrome (MFS; MIM: #154700) refers to a heritable autosomal dominant  
87 disease trait of fibrous connective tissue due to heterozygous mutations in the  
88 fibrillin-1 gene (*FBNI*; 134797) on chromosome 15q21. The cardinal phenotypic  
89 features allowing for clinical diagnosis primarily occur in the skeletal, ocular, and  
90 cardiovascular systems (DIETZ 2015). MFS is manifest by clinical features/findings  
91 involving the skeletal (tall stature, disproportionately long limbs and digits  
92 [arachnodactyly], anterior chest wall deformity, mild to moderate joint laxity and  
93 frequent spinal deformity [especially scoliosis], cardiovascular (increased risk for  
94 aortic root dilation and/or dissection), and ocular (*ectopia lentis*) systems (LOEYS *et al.*  
95 2010). Marfanoid-progeroid-lipodystrophy syndrome (MPLS; MIM: #616914) is a  
96 more recently-clarified fibrillinopathy, and also a complex disease characterized by  
97 accelerated aging and postnatal lipodystrophy, poor postnatal weight gain and  
98 characteristic dysmorphic facial features that have very rarely been clinically  
99 recognized and reported (GOLDBLATT *et al.* 2011; PASSARGE *et al.* 2016). Recent  
100 studies have implicated a potential hormone, named asprosin, encoded by the *FBNI*  
101 locus as a mediator of the lipodystrophy phenotype (ROMERE *et al.* 2016;  
102 DUERRSCHMID *et al.* 2017). All previously reported MPLS individuals consistently  
103 harbor heterozygous truncating mutations in exon 64, which leads to premature stop

104 codons in the C-terminal domain of *FBNI* (GOLDBLATT *et al.* 2011; SONG *et al.* 2012;  
105 GARG AND XING 2014; JACQUINET *et al.* 2014; PASSARGE *et al.* 2016; ROMERE *et al.*  
106 2016).

107 In this study, we present clinical and genetic, genomic and molecular data from  
108 three unrelated subjects with Marfan/Marfanoid syndrome, including the first case of  
109 clinically recognized MPLS in the Chinese population. The potential effects of  
110 truncating mutations of *FBNI* which are implicated in MPLS subjects conveying  
111 distinct dominant negative alleles and clinically distinguishable autosomal dominant  
112 (AD) disease traits were ascertained with functional assays.

## 113 **Materials and methods**

### 114 **Participant recruitment and Sample preparation**

115 A total of three Marfan syndrome/Marfanoid patients (2 singletons and 1  
116 parent-offspring trio) were consecutively recruited through the Deciphering Disorders  
117 Involving Scoliosis & Comorbidities (DISCO) project ([www.discostudy.org](http://www.discostudy.org)) at  
118 Peking Union Medical College Hospital (PUMCH). Written informed consent was  
119 provided by patients or their parents. Peripheral blood samples were extracted from  
120 affected probands and corresponding unaffected parents if available. Genomic DNA

121 was extracted with the QIAamp DNA Blood Mini Kit (QIAGEN, Germany) according  
122 to the manufacturer's instructions.

123 **Targeted next-generation sequencing, Variant processing, filtering and**  
124 **annotation**

125 To establish an NGS panel maximally covering known genes implicated in the  
126 cause of Mendelian diseases with vertebral malformation phenotypes, we performed a  
127 systematic literature and database search for congenital scoliosis (CS) related disease.  
128 After manual review, a total of 344 genes were found, corresponding to 457 CS related  
129 monogenic phenotypes. Also included was an additional set of 220 genes whose  
130 protein products are involved in the pathways related to vertebral development or in  
131 which pathogenic variant alleles have been reported in association with CS  
132 phenotypes in animal models, but not yet linked to human diseases with CS  
133 phenotypes. The target panel set comprises 564 genes, 6458 exons and flanking 30bp  
134 regions, and 2.97 Mb in total genomic size. DNA Probes for target capture were  
135 designed and purchased from NimbleGen (Roche, Switzerland)  
136 (<https://design.nimblegen.com/nimbledesign/app>). The final set of DNA probes was  
137 expected to cover 99.7% of the targeted regions. In addition to the previously  
138 published *TBX6* gene featuring a compound heterozygous inheritance model (WU *et*



139 *al.* 2015), the *FBNI* gene was also targeted in the panel. A targeted sequence  
140 enrichment library was prepared following a previously described protocol (*ASAN et*  
141 *al.* 2011). For each sample, 1 µg of genomic DNA was used as starting material.  
142 Genomic DNA was fragmented to a size of ~200-250 bp. The fragmented DNA was  
143 end-repaired, capped with A-tailing and subject to ligation of indexed adaptors. After  
144 5 cycles of PCR amplification, each indexed product was pooled and hybridized with  
145 DNA probes for targeted capture in one solution capture reaction. The product of  
146 targeted enrichment DNA was further subject to 14 cycles of PCR amplification,  
147 followed by final library yield validation by Bioanalyzer analysis (Agilent, USA) and  
148 qPCR quantification. Sequencing was performed with the PE100 mode on an Illumina  
149 HiSeq2500 sequencer (Illumina, CA, USA).

150 After generating raw sequence data, a perl script was used to remove low-quality  
151 and adaptor-contaminated reads. The remaining reads were mapped onto human  
152 reference genome assembly hg19 (GRCh37, <http://genome.ucsc.edu/>) with the BWA  
153 mapper. Additionally, single nucleotide variants (SNVs) and small insertions and  
154 deletions (indels) were called with the GATK (v2.2-3) bioinformatics package.  
155 Variants were annotated using an in-house developed annotation pipeline. We filtered  
156 out variants with common and high frequencies (Minor allele frequency >1%) in the

157 public databases (the 1000 Genomes Project, the Exome Sequencing Project 6500  
158 (<http://evs.gs.washington.edu/EVS/>), ExAC (<http://exac.broadinstitute.org>) or an  
159 in-house WES control dataset) that were also not functionally relevant (deep intronic  
160 (>30bp), untranslated regions, or synonymous SNVs, or noncoding indels). We also  
161 annotated the detected variants using a customized database based on the Human  
162 Gene Mutation Database (HGMD) and Online Mendelian Inheritance in Man (OMIM)  
163 (<https://omim.org/>).

#### 164 **Sanger sequencing**

165 Genomic DNA from all individuals was subjected to Sanger sequencing for  
166 orthogonal confirmation of all identified variants.

#### 167 **Prediction of probability of NMD events**

168 For allelic truncating frameshift variants identified in our cohort and previously  
169 reported, *in-silico* predictions of NMD events were implemented using the online  
170 NMDEscPredictor (COBAN-AKDEMIR *et al.* 2018).

#### 171 **Plasmid construction and mutagenesis**

172 A cDNA fragment containing full-length *FBNI* (GenBank ID: NM\_000138.4)  
173 cDNA derived from human muscle and having suitable restriction sites was  
174 PCR-amplified using KOD-Plus-Neo (Toyobo, Japan). The PCR amplicons were

175 cloned into the *NheI* and *SacII* sites of the pEGFP-N1 expression vector (Clontech,  
176 Takara Bio, Japan). Mutant EGFP-FBN1 plasmids were generated by site-directed  
177 mutagenesis and their construction confirmed by direct Sanger dideoxy sequencing.  
178 G2003R which was previously reported in an adolescent idiopathic scoliosis (AIS)  
179 case was used as a positive control (BUCHAN *et al.* 2014). Mutations of  
180 Tyr2596Thrfs\*86, Glu2759Cysfs\*9 and G2003R were introduced into a wild-type  
181 (WT) pEGFP-FBN1 QuikChange Lightning Site-directed Mutagenesis Kit (Agilent  
182 Technologies, CA, USA) according to the manufacturer's instructions. The resulting  
183 three mutant plasmids pEGFP-FBN1-Tyr2596Thrfs\*86,  
184 pEGFP-FBN1-Glu2759Cysfs\*9 and pEGFP-FBN1-Gly2003Arg were used for  
185 functional studies.

#### 186 **Cell culture and transfection**

187 HEK293T cells were cultured in DMEM (Gibco, Waltham, MA, USA) + 10%  
188 FCS (Biological Industries, Cromwell, USA) + 1% penicillin/streptomycin  
189 (Gibco-Life Technologies, USA) at 37°C with 5% CO<sub>2</sub>. Cells were  
190 transfected/co-transfected with a mutant and/or a WT pEGFP-FBN1 using  
191 Lipofectamine3000 (Invitrogen, CA, USA) according to the manufacturers'  
192 instructions. Six hours after transfection, the medium was replaced with fresh

193 complete DMEM culture medium, and the cells were further incubated for 48 h. Total  
194 proteins were extracted and analyzed by Western blot and SDD-AGE, respectively.

#### 195 **Western blot**

196 Cells were lysed with modified RIPA (50 mM Tris-HCL, 1% NP40, 0.25%  
197 Na-deoxycholate, 150 mM NaCl, and 1 mM EDTA; Complete<sup>TM</sup> Protease Inhibitor  
198 Cocktail [Roche]), and protein concentrations were determined with the BCA-Kit  
199 (Pierce). A total amount of 5 mg protein was size separated on an 8% SDS  
200 polyacrylamide gel, and proteins were electrophoresed and transferred to  
201 nitrocellulose membranes. Membranes were blocked in powdered milk for 30 min at  
202 room temperature (RT, 25-degrees Celsius), and primary antibodies (Phospho-Smad2  
203 (Ser245/250/255) Antibody, Cell Signaling Technology; anti-GAPDH, Millipore)  
204 were incubated overnight at 4°C. After washing, the corresponding  
205 horseradish-peroxidase-coupled goat anti-rabbit secondary antibodies (KPL) were  
206 incubated for 1h at RT. Bands were visualized with the WesternBright ECL  
207 chemiluminescence system (Advansta, CA, USA). This experiment was performed  
208 three times with different cell lysates. Chemiluminescent signals were quantified  
209 using ImageJ (SCHNEIDER *et al.* 2012).

#### 210 **SDD-AGE**

211 For Semi-Denaturing Detergent-Agarose Gel Electrophoresis (SDD-AGE)  
212 (BERCHOWITZ *et al.* 2015), HEK293T cells were co-transfected with wildtype  
213 (pEGFP-FBN1) and mutants (pEGFP-FBN1-Tyr2596Thrfs\*86;  
214 pEGFP-FBN1-Glu2759Cysfs\*9) for 6 h, and then incubated for 48 h. After 48 h  
215 incubation at 37°C with 5% CO<sub>2</sub> in the thermotank, cells were harvested by  
216 centrifugation at 3000 rcf for 2 min, resuspension in 200 µL water, and subsequent  
217 centrifugation. Approximately 100 µl of acid-washed cells were then added to each  
218 well followed by 120 µL lysis buffer (100 mM Tris pH 8, 1% Triton X-100, 50 mM  
219 β-mercaptoethanol, 3% HALT protease inhibitor cocktail, 30 mM N-ethylmaleimide,  
220 and 12.5 U/mL Benzonase nuclease). Blocks were then sealed with a rubber mat  
221 (Nunc 276002) and shaken at max speed two times for 3 min on a Qiagen Tissuelyzer  
222 2. To each well was then added 35 µL 4X sample buffer (2X TAE, 20% glycerol, 8%  
223 SDS, 0.01% bromophenol blue). The blocks were then vortexed briefly and allowed to  
224 incubate at RT for three minutes, followed by centrifugation for 2 min at 3000 rcf to  
225 remove cell debris. Electrophoresis and capillary blotting to Hybond ECL  
226 nitrocellulose were performed as described. Proteins were transferred to a  
227 polyvinylidene difluoride membrane and probed with well-characterized monoclonal  
228 antibody of anti-Fibrillin 1 (Abcam ab124334, Cambridge, UK).

229 **Statistical analysis**

230 SPSS software, version 17.0 (IBM Corporation; USA), was used to conduct  
231 student's two-tailed t-test comparing values of test and control samples. *P*-values of  
232 less than 0.05 were considered statistically significant.

233 **Data availability statement**

234 All reagents and plasmids are available upon request. Table S1 and S2 contain a  
235 list and descriptions of summary statistics of targeted genes for CS panel and targeted  
236 sequencing of 564 genes, respectively. Supplemental files have been submitted to  
237 figshare. All mutations identified in this study have been submitted to the Clinvar  
238 database (Accession ID: VCV000617941, VCV000617942, VCV000617943).

239

240 **Results**

241 **Clinical characterization and novel allelic variants of individuals with**  
242 **MFS/Marfanoid disease**

243 **Subject XH253.** The proband was a 10-year-old Chinese girl (**Fig.1A-D**) who  
244 presented with kyphoscoliosis confirmed by radiologic imaging. She was referred to  
245 our orthopedic spine specialist for further evaluation and management. Whole-spine  
246 X ray examination revealed scoliosis with three curves. Cobb angle of the major

247 curvature was 43 degrees, and she displayed a flat back and thoracolumbar kyphosis.  
248 Transthoracic echocardiographic evaluation revealed moderate mitral valve  
249 insufficiency and an aortic root measurement of 3.6 cm (Z-score=4.5 when  
250 standardized to age and body surface area). Skeletal system abnormalities such as long  
251 and thin limbs, and arachnodactyly were observed in the proband.  
252 Diminution of vision (myopia) occurred when she was 5 years old. The proband  
253 fulfilled the clinical criteria for classical MFS according to Ghent classification  
254 (**Table.1**), with a total of 7 points for the score in the revised Ghent Criteria (LOEYS *et*  
255 *al.* 2010). A heterozygous frameshift deletion c.7785delC (p.Tyr2596Thrfs\*86) was  
256 identified in *FBNI* (RefSeq transcript number: NM\_000138.4) in the proband via  
257 targeted NGS, and subsequently confirmed by further validation using an orthogonal  
258 experimental approach of Sanger sequencing (**Fig.1E**).

259 **Subject XH474.** The proband was a 16-year-old Chinese girl (**Fig.1F, G**) who  
260 presented with *pectus excavatum* and scoliosis confirmed by radiologic imaging.  
261 Transthoracic echocardiographic evaluation revealed anterior mitral leaflet prolapse  
262 and moderate mitral valve insufficiency and an aortic root diameter measurement at  
263 the level of the sinuses of Valsalva of 2.6 cm (Z-score=1.3 when standardized to age  
264 and body surface area). Skeletal system abnormalities were present, such as tall stature

265 with a height of 171 cm (P<sub>97</sub>; +3SD), slender body habitus with a weight of 48 kg (P<sub>25</sub>,  
266 -1SD), and very thin and long upper and lower limbs. Both of her hands indicated an  
267 appearance of arachnodactyly; wrist sign and thumb sign were positive. According to  
268 the revised Ghent nosology in 2010, an *FBNI* mutation is identified in this sporadic  
269 case but aortic root measurements are still below Z score=3 (Z=1.3), the term  
270 'potential MFS' should be proposed to use until the aorta reaches threshold. Herein,  
271 the second patient here should be categorized as 'potential MFS' (**Table.1**), with a  
272 total of 8 points for the systemic score according to the revised Ghent Criteria (LOEYS  
273 *et al.* 2010). Heterozygous *FBNI* missense variants c.4890\_4891delGTinsTG  
274 (p.Gln1630\_Cys1631delinsHisGly) were identified in the proband via targeted NGS  
275 and validated by Sanger sequencing (**Fig.1H**). The missense variants were confirmed  
276 to be *in cis* and comprising a complex allele resulting from a dinucleotide variant by  
277 visualizing read alignment views from the Integrative Genomics Viewer (IGV)  
278 (**Fig.1I**). Notably, the missense variant of c.4891T>G (p.Cys1631Gly) has been  
279 previously reported as a disease-causing mutation in a classical MFS individual,  
280 whose clinical course and phenotype was characterized by aortic root dissection,  
281 aortic root dilation, mitral valve regurgitation, tricuspid valve prolapse, *ectopia lentis*  
282 (ARBUSTINI *et al.* 2005). Conservation analysis of amino acid residues of Gln1630



283 and Cys1631in *FBNI* demonstrate that they are highly conserved throughout  
284 evolution and across many selected species, suggesting they are required for the  
285 normal function of the protein. Thus, the monoallelic missense variants were most  
286 likely damaging and putatively deleterious and possibly accounted for 'potential MFS'  
287 in this proband (**Fig.1J**).

288 **Subject XH601.** The proband was a 9-year-old Chinese girl (**Fig.1K, L**). When  
289 she was 4 years old at the time of her first evaluation, she presented with a height of  
290 101 cm (P<sub>25</sub>; -1SD), an extremely thin body habitus with a weight of 12 kg (P<sub>3</sub>, -3SD).  
291 Physical examination revealed bilateral arachnodactyly (**Fig.1M, N**), uneven  
292 asymmetric back whilst bending and congenital dislocation of the hip joint.  
293 Whole-spine X ray examination displayed severe right thoracic scoliosis with a main  
294 Cobb angle of 117 degrees (**Fig.1O, P**). Transthoracic echocardiogram demonstrated  
295 anterior and posterior mitral leaflet prolapse and moderate mitral valve insufficiency  
296 without apparent aortic diameter enlargement at the sinuses of Valsalva or aortic root  
297 dissection. Ocular system abnormalities indicated bilateral down-slanting palpebral  
298 fissures, epicanthus and astigmatism. However, there were no signs or symptoms of  
299 ectopia lentis. The predominant features in this patient were an extreme congenital  
300 lack of subcutaneous fat, consistent with a lipodystrophy by physical exam, and a

301 subsequent bodily progeroid appearance. However, this proband did not meet revised  
302 Ghent Criteria for classical MFS. Consecutive follow-ups and assessment of the  
303 proband were conducted. Upon genotype driven reverse phenotyping of the proband  
304 when she was 9, the proportion of upper and lower segment lengths was basically  
305 normal with a ratio of 0.87. The proband had a height of 136 cm (P<sub>50</sub>, 0). For  
306 comparison, her father's height measurement was 170 cm and her mother's was 160  
307 cm. The body mass index (BMI) of the proband was extremely low (11.1 kg/m<sup>2</sup>)  
308 potentially due to disproportionate weight gain by age. More specifically, the patient  
309 had an extremely thin habitus with a weight of 20.5 Kg (P<sub>3</sub>, -3SD). Furthermore, hand  
310 and foot radiographs to potentially assess 'bone age' suggested bilateral  
311 metacarpophalangeal joint dislocation, interosseous atrophy and dolichostenomelia  
312 (**Fig.1Q, R**). The proband was eventually diagnosed with  
313 Marfanoid-progeroid-lipodystrophy syndrome (**Table.2**). Through targeted NGS, a  
314 heterozygous variant of c.8275\_8291delGAGAAGACAGCCATCTT  
315 (c.8275\_8291del; p.Glu2759Cysfs\*9) in *FBNI* was identified in the proband. We  
316 consequently confirmed this variant in subject XH601 and it was indeed *de novo*  
317 through parental Sanger sequencing and trio analysis (**Fig.1S**). In addition to Sanger

318 sequencing validation, we also performed cloning sequencing on Subject XH601 to  
319 further verify that this indel is subject to frame-shift variation (data not shown).

320 Moreover, these two allelic truncating variants of p.Tyr2596Thrfs\*86 and  
321 p.Glu2759Cysfs\*9 were not present in ExAC, 1000 Genome, ESP6500 database,  
322 universal mutation database (UMD) (COLLOD-BEROUD *et al.* 2003) and our in-house  
323 database (with 2000+ Chinese exomes). Clinical and genetic characteristics of subject  
324 XH253 with classical MFS and XH474 with 'potential MFS' based on the revised  
325 Ghent Criteria (LOEYS *et al.* 2010) are presented in Table 1.

326

### 327 **NMD-degradation prediction**

328 The variant of Y2596Tfs\*86 identified in XH253 was a single nucleotide  
329 frameshift deletion leading to a premature termination codon (PTC) in Exon 64, while  
330 E2759Cfs\*9 identified in XH601 was a frameshift deletion leading to a PTC in Exon  
331 66, the final exon of *FBNI* (**Fig. 2A**). Although both variants are very close in linear  
332 space, they may lead to distinct alterations to the *FBNI* transcript. To investigate this  
333 hypothesis, we performed NMD predictions of the two truncating variants on  
334 NMDescPredictor (COBAN-AKDEMIR *et al.* 2018). The result showed that  
335 Y2596Tfs\*86 is predicted to be degraded by NMD, i.e. NMD<sup>+</sup>, while E2759Cfs\*9 is

336 predicted to escape NMD, i.e. NMD<sup>-</sup> (**Fig. 2B**). Using the same analytical tools, we  
337 further tested whether previously reported protein-truncating *FBN1* frameshift  
338 variants implicated in MPLS subjects (GRAUL-NEUMANN *et al.* 2010; GOLDBLATT *et*  
339 *al.* 2011; TAKENOUCI *et al.* 2013; GARG AND XING 2014) uniformly shared the  
340 mechanism of escaping NMD. Our analysis shows that all of the truncating *FBN1*  
341 frameshift variants within the C-terminal gene region may escape NMD, supporting  
342 the contention that the underlying disease mechanism in MPLS is the same and  
343 distinct from MFS (**Fig. 2B**). These findings implicate a mechanism distinct from  
344 loss-of-function (LoF) alleles, and potentially gain-of-function (GoF) variant alleles  
345 (COBAN-AKDEMIR *et al.* 2018), at the *FBN1* locus causing MPLS.

346

#### 347 **Perturbation of native aggregation process by MPLS-causative truncating** 348 **mutation**

349 To further determine if the mutant *FBN1* protein in MPLS is able to lead to  
350 dominant negative or GoF effects, plasmids expressing mutants  
351 (pEGFP-*FBN1*-Tyr2596Thrfs\*86; pEGFP-*FBN1*-Glu2759Cysfs\*9) and WT plasmid  
352 (pEGFP-*FBN1*) were co-transfected into HEK293T cells at a 1:1 ratio. After 48h of  
353 expression, lysates from cells expressing EGFP-*FBN1* fusions were analyzed by  
354 SDD-AGE. Detection of SDS-resistant aggregates by SDD-AGE in cell lysates of

355 HEK293T transiently expressing EGFP-FBN1 fusions were investigated with  
356 SDD-AGE and Western blot. Protein expression was induced for 48 h and detected  
357 with a monoclonal FBN1-specific antibody. Remarkably, WT plasmid (EGFP-FBN1  
358 fusions) had the SDS-resistance properties of an amyloidogenic protein structure.  
359 Since amyloid formation is time- and concentration-dependent, we set the time of  
360 transient expression to 48 h. WT plasmid (EGFP-FBN1 fusions) were aggregated after  
361 48 h expression, whereas co-transfection of pEGFP-FBN1-Glu2759Cysfs\*9 and WT  
362 plasmid resulted in the presence of a small fraction of monomer protein. This suggests  
363 that pEGFP-FBN1-Glu2759Cysfs\*9 apparently prohibited the native aggregation  
364 process of WT plasmid, possibly revealing an intracellular dominant-negative  
365 mechanism. In addition, we observed that co-transfection of  
366 pEGFP-FBN1-Tyr2596Thrfs\*86 and WT plasmid presented a small fraction of  
367 aggregated protein. As this fraction was less than that of the WT plasmid, it can be  
368 suggested that Tyr2596Thrfs\*86 may undergo an NMD mechanism thus leading to  
369 *FBN1* haploinsufficiency (**Fig.3A**). Moreover, these variations in the range of particle  
370 sizes were observed, and again were reproducible for individual EGFP-FBN1 fusions  
371 validated by another two independent replication experiments.  
372

373 **Disruption of downstream TGF- $\beta$  signaling**

374 Previous studies have demonstrated that deleterious *FBNI* mutations causing  
375 Marfan syndrome result in upregulated endogenous transforming growth factor  $\beta$   
376 (TGF- $\beta$ ) receptor signaling (ANDELFINGER *et al.* 2016). Such signaling can be  
377 measured in plasma or indirectly measured through aberrant activation of downstream  
378 targets, including excessive phosphorylation of SMAD2 (pSMAD2) (VERSTRAETEN  
379 *et al.* 2016). To determine the functional consequences of the novel truncating *FBNI*  
380 variant of E2759Cfs\*9 in the MLPS patient, plasmids expressing mutant EGFP-*FBNI*  
381 cDNAs were transfected into HEK293T cells. Transfected cells with truncating *FBNI*  
382 variants of Y2596Tfs\*86 (P=0.007), E2759Cfs\*9 (P=0.017) and Gly2003Arg  
383 (P=0.006) showed significantly elevated phosphorylation of SMAD2 (pSMAD2) in  
384 Western blots compared to the WT plasmid (**Fig.3B, C**). This observation is consistent  
385 with the contention that the TGF- $\beta$  signaling pathway is perturbed in a  
386 SMAD-dependent manner in all 3 subjects.

387

388 **Genotypic and phenotypic features of reported MPLS patients**

389 Intriguingly, the mechanism underlying *FBNI*-related diseases involves either  
390 loss-of-function (LoF) or NMD surveillance pathway escape as conveyed by allelic  
391 truncating mutations. Such distinct mechanisms could contribute to distinct disease

392 phenotypes of varying severity. According to a previous report, *FBNI* LOF mutations  
393 led to classical MFS (PARK *et al.* 2017), while predicted NMD surveillance pathway  
394 escape in *FBNI* can cause a MPLS phenotype (ROMERE *et al.* 2016), Patient XH601  
395 in our cohort harbored a heterozygous *de novo* variant of E2759Cfs\*9 in *FBNI*, which  
396 is located in the final exon. Notably, our MPLS patients presented with  
397 bilateral down-slanting palpebral fissures, epicanthus and eye astigmatism. The main  
398 clinical features of this complicated disorder, clustered in Table 2, include accelerated  
399 aging and postnatal lipodystrophy, poor weight gain since birth, premature birth,  
400 hyperextensible digits and generalized subcutaneous fat reduction leading to a  
401 progeroid appearance of the body in all patients. Mental and motor development  
402 remain mostly normal. Overlapping clinical features of MPLS with MFS are  
403 phenotypically diverse. Ocular system involvement like myopia have been observed  
404 in all individuals, although hyperextensible joints, arachnodactyly, and other  
405 significant signs of classical MFS are not always present, i.e. mitral valve prolapse in  
406 4/8, lumbosacral dural ectasia in 2/3 (5 data points unavailable), *pectus excavatum* in  
407 3/8, and ectopia lentis in 3/8. Scoliosis was reported in two patients aged 23 and 17  
408 years, and kyphosis was reported in a patient aged 27 years, but not described in the  
409 others (**Table.2**). Remarkably, the major Cobb angles of Subject XH253 with classical

410 MFS and Subject XH474 with MASS were 43 degrees and 85 degrees, respectively.  
411 Our MPLS patient presented a thoracic scoliosis with a major Cobb angle magnitude  
412 of 117 degrees—a condition much more severe compared to the MFS patients,  
413 counterparts.

## 414 **Discussion**

415 In the present report, we provide direct evidence for potential dominant negative  
416 alleles in MPLS patients caused by truncating *FBNI* variants escaping NMD. These  
417 genetic and functional investigations also include description of the first patient with  
418 MPLS of Chinese ancestry.

419 Several case reports previously identified an association between monogenic  
420 *FBNI* mutations and reduction of subcutaneous fat and/or progeroid features  
421 (GRAUL-NEUMANN *et al.* 2010; GOLDBLATT *et al.* 2011; TAKENOUCI *et al.* 2013;  
422 JACQUINET *et al.* 2014; PASSARGE *et al.* 2016). Here, we have provided further  
423 evidence for the existence of a distinct genetic disease, MPLS, caused by *FBNI*  
424 mutations. The MPLS patient in our study is characterized by accelerated aging and  
425 postnatal lipodystrophy, disproportionate weight gain since birth, severe scoliosis,  
426 downslanting palpebral fissures, bilateral metacarpophalangeal joint dislocation,



427 mitral valve prolapse, bilateral interosseous atrophy, and congenital dislocation of the  
428 hip. Intriguingly, this patient was previously diagnosed with Marfanoid disease  
429 (**Table.1**) due to an unclear molecular diagnosis. We consequently performed targeted  
430 NGS on the affected proband and her unaffected parents. As a result, we identified  
431 c.8275\_8291del(p.Glu2759Cysfs\*9) in *FBNI* as the responsible variant for the  
432 proband. Sanger sequencing was then conducted on genomic DNA from both parents  
433 to confirm the *de novo* occurrence and segregation with phenotypes. Subsequently, we  
434 proceeded with a comprehensive phenotypic analysis of all family members through  
435 intensive clinical follow-up. By combining genetic data with reverse phenotyping, we  
436 eventually diagnosed the proband with MPLS. Notably, the severity of spinal  
437 deformity in the MPLS individual was significantly more severe than that in Subject  
438 XH253 and XH474 (with classical MFS and potential MFS, respectively). We  
439 consider that MPLS is a distinct fibrillinopathy because it can be clinically  
440 distinguished from other fibrillinopathies, including classical MFS. To our knowledge,  
441 there are no other syndromes that simultaneously comprise the clinical phenotypes of  
442 marfanoid features, accelerated aging, postnatal lipodystrophy, poor weight gain since  
443 birth, and progeroid appearance. Particularly, the involvement of both reduced  
444 subcutaneous fat tissue and progeroid appearance is a prominent characteristic of

445 MPLS. These comprehensive findings predominate in determining the severity of  
446 defects in individuals and thus significantly influence the prognosis: lipodystrophic  
447 disorders are frequently associated with metabolic disturbance, such as insulin  
448 resistance and life-threatening hypertriglyceridemia (VANTYGHEM *et al.* 2012). Such  
449 potential metabolic disturbances are particularly important to note prior to surgical  
450 intervention as has been noted for the ocular-scoliotic form of Ehlers Danlos  
451 syndrome due to lysyl hydroxylase deficiency (YEOWELL *et al.* 1995). Secondly,  
452 elucidation of the phenotype of MPLS has been limited due to the paucity of prior  
453 clinical reports, with only seven relevant patients previously described. Up to now, it  
454 is known only to be caused by a single gene with a monogenic AD inheritance pattern  
455 for the disease trait. Finally, we have shown that, in terms of pathogenic mechanisms,  
456 the truncating *FBNI* mutations that cause MPLS cluster in 3' gene regions encoding  
457 the extreme C-terminal domains and these variant alleles represent a subset that differ  
458 from those that cause classical MFS. Most of such mutations will be anticipated to  
459 escape NMD and we propose these to function via a potential mechanism between  
460 GoF and dominant negative and not a LoF mechanism.

461 Fibrillin-1 acts as the precursor to a recently-described glucogenic hormone:  
462 aprosin (DAVIS *et al.* 2016a). Specifically, Exon 65 of *FBNI* encodes 11 amino acids,

463 while Exon 66 of *FBNI* encodes 129 amino acids of asprosin (ROMERE *et al.* 2016).  
464 Recently, Chen *et al.* have successfully constructed a gene-edited rabbit model with a  
465 truncated C-terminus of fibrillin-1 involving the ultimate two exons which could  
466 recapitulate the histopathological alterations and functional defects associated with  
467 MPLS (CHEN *et al.* 2018). Since individuals with low fibrillin-1 level may fail to  
468 differentiate adipocytes and/or to accumulate adipocyte lipids, truncating variants  
469 located adjacent to the two exons of *FBNI* are prone to cause lipodystrophic  
470 phenotypes (DAVIS *et al.* 2016b).

471 PTCs located in the final coding exon are specifically prone to escape NMD and so  
472 are processed distinctly from those in internal exons in terms of transcript degradation,  
473 leading to the stable translation of truncated proteins (BAYRAM *et al.* 2017). Excessive  
474 amounts of mutated protein are therefore produced (INOUE *et al.* 2004), leading to a  
475 dominant negative molecular mechanism and the severe MPLS disease phenotype.  
476 Consistent with this interpretation, all truncating mutations associated with MPLS are  
477 located adjacent to the penultimate exon (Exon 65) and are predicted to escape NMD  
478 (**Figure.4**). From this perspective, it is perhaps most parsimonious to postulate that the  
479 incorporation of relatively few mutant monomers would be sufficient to impair the  
480 systemic processes of microfibrillar assembly and function.

481 Aberrant activation of the TGF- $\beta$  pathway has been observed in MFS and may  
482 account for some of the musculoskeletal deformities, such as scoliosis (BUCHAN *et al.*  
483 2014). The MPLS patient with a truncating *FBNI* variant presented with severe  
484 scoliosis, which suggests that the protein change also alters TGF- $\beta$  signaling. Our  
485 results showed upregulation of the TGF- $\beta$  pathway in plasmids expressing mutant  
486 EGFP-FBN1 cDNAs, confirming that the variant of E2759Cfs\*9 identified in the  
487 MPLS patient has functional effects in a SMAD-dependent manner in all 3 subjects.

488 Our study indicated that the two phenotypes associated with *FBNI* mutations,  
489 MPLS and MFS are caused by two distinct molecular mechanisms. The more severe  
490 phenotype of MPLS, which had its first report in the Chinese population, is caused by  
491 nonsense mutations that produce truncated *FBNI* mutant proteins. These proteins  
492 disrupt the process of native amyloid-like structure conformation and exert potent  
493 intracellular dominant-negative activity. In this view, abnormal protein derived from  
494 the mutant allele interacts and interferes with protein derived from the normal allele,  
495 consequently resulting in substantial loss of function. Supportive evidence includes (a)  
496 *de novo* monogenic AD inheritance pattern, and (b) aggregation of fibrillin-1 in which  
497 the mutated monomer derived from the mutant allele impairs the fundamental  
498 structure of its wildtype protein derived from the normal allele counterpart. This

499 deficiency could be supported by SDD-AGE analysis, suggesting that dominant  
500 negative interference is not restricted to enhanced proteolytic clearance of mutant  
501 microfibrils over time (BRENN *et al.* 1996), but rather could also occur at the level of  
502 intracellular aggregate formation processes. The more moderate phenotype, classical  
503 MFS, is caused by nonsense mutations that activate the NMD RNA surveillance  
504 pathway, thereby degrading mutant transcripts and resulting in *FBNI*  
505 haploinsufficiency. The data support the concept of distinct pathogenetic mechanisms,  
506 GoF *versus* LoF (BAYRAM *et al.* 2017; COBAN-AKDEMIR *et al.* 2018; POLI *et al.* 2018),  
507 for each well-established subgroup of fibrillinopathy, which mostly hinges on the  
508 intrinsic features of fibrillin-1 mutations. It is of crucial significance to pinpoint and  
509 appreciate the locus heterogeneity, clinical relevance and overlapping clinical features  
510 with other syndromes/disorders in a phenotype-oriented approach that characterizes  
511 much of clinical medicine practice (WHITE *et al.* 2018).

512 In conclusion, we provide direct evidence of dominant negative effects of  
513 truncating *FBNI* variants predicted to escape NMD in MPLS patients. Our study  
514 expands the mutational spectrum of *FBNI* and highlights the potential molecular  
515 mechanism for MPLS patients, which facilitates our understanding of  
516 genotype-phenotype correlations in terms of *FBNI* to provide effective genetic

517 counseling, implementation and timing of therapy (e.g. mitigation of TGF- $\beta$   
518 hypersignaling, surgical intervention for cardiovascular complications or for  
519 scoliosis), or early intervention.

## 520 **Acknowledgments**

521 We are grateful to the patients, their families, and genetic counselors for  
522 providing samples and clinical histories. This research was funded in part by the  
523 National Natural Science Foundation of China (81672123 to JG.Z, 81822030 to  
524 N.W., 81772299 to ZH.W., 81772301 to GX.Q. ), Beijing Natural Science  
525 Foundation (7172175 to N.W.; 7184232 for S.L., 5184037 to TS.S.), CAMS  
526 Initiative for Innovative Medicine (2016-I2M-3-003 to GX.Q. and N.W.,  
527 2016-I2M-2-006 and 2017-I2M-2-001 to ZH.W.), the Central Level Public Interest  
528 Program for Scientific Research Institute (2018RC31003 to N.W. and M.L.), the  
529 National Key Research and Development Program of China (No. 2018YFC0910506  
530 to N.W. and ZH.W., 2016YFC0901501 to SY.Z.), the US National Institutes of  
531 Health, National Institute of Neurological Disorders and Stroke (NINDS R01  
532 NS058529 and R35 NS105078 to J.R.L.), National Human Genome Research  
533 Institute/National Heart, Lung, and Blood Institute (NHGRI/NHLBI UM1  
534 HG006542 to J.R.L.), and the National Human Genome Research Institute (NHGRI

535 K08 HG008986 to J.E.P).

536

### 537 **Conflict of interest**

538 J.R.L has stock ownership in 23andMe, is a paid consultant for Regeneron  
539 Pharmaceuticals, and is a co-inventor on multiple the United States and European  
540 patents related to molecular diagnostics for inherited neuropathies, eye diseases and  
541 bacterial genomic fingerprinting. The Department of Molecular and Human Genetics  
542 at Baylor College of Medicine derives revenue from the chromosomal microarray  
543 analysis and clinical exome sequencing offered in the Baylor Genetics Laboratory  
544 (<http://bmgl.com>).

545

### 546 **References**

547 Andelfinger, G., B. Loeys and H. Dietz, 2016 A Decade of Discovery in the Genetic  
548 Understanding of Thoracic Aortic Disease. *Can J Cardiol* 32: 13-25.  
549 Arbustini, E., M. Grasso, S. Ansaldi, C. Malattia, A. Pilotto et al., 2005 Identification  
550 of sixty-two novel and twelve known *FBNI* mutations in eighty-one  
551 unrelated probands with Marfan syndrome and other fibrillinopathies. *Hum*  
552 *Mutat* 26: 494.

- 553 Asan, Y. Xu, H. Jiang, C. Tyler-Smith, Y. Xue et al., 2011 Comprehensive  
554 comparison of three commercial human whole-exome capture platforms.  
555 Genome Biol 12: R95.
- 556 Bayram, Y., J. J. White, N. Elcioglu, M. T. Cho, N. Zadeh et al., 2017 REST  
557 Final-Exon-Truncating Mutations Cause Hereditary Gingival Fibromatosis.  
558 Am J Hum Genet 101: 149-156.
- 559 Berchowitz, L. E., G. Kabachinski, M. R. Walker, T. M. Carlile, W. V. Gilbert et al.,  
560 2015 Regulated Formation of an Amyloid-like Translational Repressor  
561 Governs Gametogenesis. Cell 163: 406-418.
- 562 Brenn, T., T. Aoyama, U. Francke and H. Furthmayr, 1996 Dermal fibroblast culture  
563 as a model system for studies of fibrillin assembly and pathogenetic  
564 mechanisms: defects in distinct groups of individuals with Marfan's  
565 syndrome. Lab Invest 75: 389-402.
- 566 Buchan, J. G., D. M. Alvarado, G. E. Haller, C. Cruchaga, M. B. Harms et al., 2014  
567 Rare variants in *FBN1* and *FBN2* are associated with severe adolescent  
568 idiopathic scoliosis. Hum Mol Genet 23: 5271-5282.
- 569 Chen, M., B. Yao, Q. Yang, J. Deng, Y. Song et al., 2018 Truncated C-terminus of  
570 fibrillin-1 induces Marfanoid-progeroid-lipodystrophy (MPL) syndrome in



- 571 rabbit. *Dis Model Mech* 11.
- 572 Coban-Akdemir, Z., J. J. White, X. Song, S. N. Jhangiani, J. M. Fatih et al., 2018
- 573 Identifying Genes Whose Mutant Transcripts Cause Dominant Disease Traits
- 574 by Potential Gain-of-Function Alleles. *Am J Hum Genet* 103: 171-187.
- 575 Collod-Beroud, G., S. Le Bourdelles, L. Ades, L. Ala-Kokko, P. Booms et al., 2003
- 576 Update of the UMD-FBN1 mutation database and creation of an *FBN1*
- 577 polymorphism database. *Hum Mutat* 22: 199-208.
- 578 Davis, M. R., E. Arner, C. R. Duffy, P. A. De Sousa, I. Dahlman et al., 2016a
- 579 Datasets of genes coexpressed with *FBN1* in mouse adipose tissue and during
- 580 human adipogenesis. *Data Brief* 8: 851-857.
- 581 Davis, M. R., E. Arner, C. R. Duffy, P. A. De Sousa, I. Dahlman et al., 2016b
- 582 Expression of *FBN1* during adipogenesis: Relevance to the lipodystrophy
- 583 phenotype in Marfan syndrome and related conditions. *Mol Genet Metab* 119:
- 584 174-185.
- 585 Dietz, H. C., 2015 Potential Phenotype-Genotype Correlation in Marfan Syndrome:
- 586 When Less is More? *Circ Cardiovasc Genet* 8: 256-260.
- 587 Duerrschmid, C., Y. He, C. Wang, C. Li, J. C. Bournat et al., 2017 Asprosin is a
- 588 centrally acting orexigenic hormone. *Nat Med* 23: 1444-1453.

- 589 Garg, A., and C. Xing, 2014 De novo heterozygous *FBNI* mutations in the extreme  
590 C-terminal region cause progeroid fibrillinopathy. *Am J Med Genet A* 164a:  
591 1341-1345.
- 592 Goldblatt, J., J. Hyatt, C. Edwards and I. Walpole, 2011 Further evidence for a  
593 marfanoid syndrome with neonatal progeroid features and severe generalized  
594 lipodystrophy due to frameshift mutations near the 3' end of the *FBNI* gene.  
595 *Am J Med Genet A* 155a: 717-720.
- 596 Graul-Neumann, L. M., T. Kienitz, P. N. Robinson, S. Baasanjav, B. Karow et al.,  
597 2010 Marfan syndrome with neonatal progeroid syndrome-like lipodystrophy  
598 associated with a novel frameshift mutation at the 3' terminus of the  
599 *FBNI*-gene. *Am J Med Genet A* 152a: 2749-2755.
- 600 Inoue, K., M. Khajavi, T. Ohyama, S. Hirabayashi, J. Wilson et al., 2004 Molecular  
601 mechanism for distinct neurological phenotypes conveyed by allelic  
602 truncating mutations. *Nat Genet* 36: 361-369.
- 603 Jacquinet, A., A. Verloes, B. Callewaert, C. Coremans, P. Coucke et al., 2014  
604 Neonatal progeroid variant of Marfan syndrome with congenital  
605 lipodystrophy results from mutations at the 3' end of *FBNI* gene. *Eur J Med*  
606 *Genet* 57: 230-234.

- 607 Loeyes, B. L., H. C. Dietz, A. C. Braverman, B. L. Callewaert, J. De Backer et al.,  
608 2010 The revised Ghent nosology for the Marfan syndrome. *J Med Genet* 47:  
609 476-485.
- 610 Park, J. W., L. Yan, C. Stoddard, X. Wang, Z. Yue et al., 2017 Recapitulating and  
611 Correcting Marfan Syndrome in a Cellular Model. *Int J Biol Sci* 13: 588-603.
- 612 Passarge, E., P. N. Robinson and L. M. Graul-Neumann, 2016  
613 Marfanoid-progeroid-lipodystrophy syndrome: a newly recognized  
614 fibrillinopathy. *Eur J Hum Genet* 24: 1244-1247.
- 615 Poli, M. C., F. Ebstein, S. K. Nicholas, M. M. de Guzman, L. R. Forbes et al., 2018  
616 Heterozygous Truncating Variants in *POMP* Escape Nonsense-Mediated  
617 Decay and Cause a Unique Immune Dysregulatory Syndrome. *Am J Hum*  
618 *Genet* 102: 1126-1142.
- 619 Romere, C., C. Duerrschmid, J. Bournat, P. Constable, M. Jain et al., 2016 Asprosin,  
620 a Fasting-Induced Glucogenic Protein Hormone. *Cell* 165: 566-579.
- 621 Schneider, C. A., W. S. Rasband and K. W. Eliceiri, 2012 NIH Image to ImageJ: 25  
622 years of image analysis. *Nat Methods* 9: 671-675.
- 623 Song, Y. H., G. H. Kim, H. W. Yoo and J. B. Kim, 2012 Novel de novo nonsense  
624 mutation of *FBNI* gene in a patient with Marfan syndrome. *J Genet* 91:

625 233-235.

626 Takenouchi, T., M. Hida, Y. Sakamoto, C. Torii, R. Kosaki et al., 2013 Severe  
627 congenital lipodystrophy and a progeroid appearance: Mutation in the  
628 penultimate exon of *FBNI* causing a recognizable phenotype. *Am J Med*  
629 *Genet A* 161a: 3057-3062.

630 Vantyghem, M. C., A. S. Balavoine, C. Douillard, F. Defrance, L. Dieudonne et al.,  
631 2012 How to diagnose a lipodystrophy syndrome. *Ann Endocrinol (Paris)* 73:  
632 170-189.

633 Verstraeten, A., M. Alaerts, L. Van Laer and B. Loeys, 2016 Marfan Syndrome and  
634 Related Disorders: 25 Years of Gene Discovery. *Hum Mutat* 37: 524-531.

635 White, J. J., J. F. Mazzeu, Z. Coban-Akdemir, Y. Bayram, V. Bahrambeigi et al.,  
636 2018 WNT Signaling Perturbations Underlie the Genetic Heterogeneity of  
637 Robinow Syndrome. *Am J Hum Genet* 102: 27-43.

638 Wu, N., X. Ming, J. Xiao, Z. Wu, X. Chen et al., 2015 *TBX6* null variants and a  
639 common hypomorphic allele in congenital scoliosis. *N Engl J Med* 372:  
640 341-350.

641 Yeowell, H. N., L. C. Walker, M. K. Marshall, S. Murad and S. R. Pinnell, 1995 The  
642 mRNA and the activity of lysyl hydroxylase are up-regulated by the

643 administration of ascorbate and hydralazine to human skin fibroblasts from a  
644 patient with Ehlers-Danlos syndrome type VI. Arch Biochem Biophys 321:  
645 510-516.  
646

647 **Figure Legends**

648 **Figure 1** Clinical and genetic manifestations of the research subjects

649 (A, B) Pictures of patient XH253 indicated bilateral arachnodactyly of hands and  
650 feet.

651 (C, D) The anterior and lateral view of Patient XH253 demonstrated scoliosis on  
652 whole-spine X-ray images.(E) Sanger sequencing of XH253 verified a novel  
653 heterozygous frameshift variant of p.Tyr2596Thrfs\*86 in *FBNI*. (F, G) The anterior  
654 and lateral view of subject XH474 demonstrated scoliosis on whole-spine X-ray  
655 images. (H) Sanger sequencing verified monoallelic missense mutations of  
656 p.Gln1630His and p.Cys1631Gly in *FBNI*. (I) Integrative Genomics Viewer (IGV)  
657 displays varying level of alignment reads detail depending on the zoom level and  
658 uses red box and transparency to highlight monoallelic missense variants in the  
659 exome data from XH474.

660 (J) Conservation analysis of amino acid residues of *FBNI* among vertebrates.  
661 Lines indicate homologous amino acid sequences in selected vertebrates. Note the  
662 strong conservation of Cys1631 among vertebrates highlighted in red and Gln1630  
663 highlighted in green, respectively. (K, L, M, N) Photographic images of subject  
664 XH601 who presented with scoliosis, short stature and subcutaneous fat reduction

665 and arachnodactyly anomalies of hands and feet.(O, P) The anterior and lateral view  
666 demonstrated severe scoliosis on whole-spine X-ray images.  
667 (Q, R) Hand and foot radiographs showed bilateral metacarpophalangeal dislocation,  
668 interosseous atrophy, claw hands and dolichostenomelia. (S) Sanger sequencing of  
669 XH601 parent-offspring trio verified a novel de novo heterozygous frameshift  
670 mutation of p.Glu2759Cysfs\*9 in *FBNI*. The RefSeq transcript number of *FBNI* is  
671 NM\_000138.4.

672

673 **Figure 2** Schematic representations and NMD predictions of the p.Y2596Tfs\*86 and  
674 p.E2759Cfs\*9 mutations other MPLS-affected frameshift mutations in *FBNI*

675 (A) Schematic diagrams of full-length WT and mutant EGFP-*FBNI* plasmids  
676 transiently expressed in HEK293T. The numbers indicate the amino acid positions in  
677 *FBNI*. PTC location is marked with red circle. The resulting frameshift and  
678 reduction in the deduced amino acid sequence caused by the p.Y2596Tfs\*86 and  
679 p.E2759Cfs\*9 mutations are indicated by the yellow region, respectively.

680 (B) Prediction of frameshift variants that are potentially subject to  
681 nonsense-mediated mRNA decay (NMD)-escape or NMD-degradation. The  
682 mutation of p.Y2596Tfs\*86 in *FBNI* gene is predicted to be subject to degradation

683 by triggering NMD. The p.E2759Cfs\*9 mutation in *FBNI* gene is predicted to  
684 escape NMD. All of other MPLS-affected frameshift mutations in *FBNI* are  
685 predicted to escape NMD.

686

687 **Figure 3** Functional effects of the Y2596Tfs\*86 and E2759Cfs\*9 mutations on  
688 *FBNI* protein expression

689 (A) Detection of SDS-resistant aggregates by SDD-AGE in cell lysates of HEK293T  
690 transiently expressing EGFP-*FBNI* fusions were investigated by SDD-AGE and  
691 Western blot. Expression of the proteins was induced for 48 h and detected with a  
692 monoclonal *FBNI*-specific antibody.

693 (B) Elevated phosphorylation of SMAD2 (pSMAD2) in individuals with truncating  
694 *FBNI* variants, respectively. G2003R is used as a positive control. GAPDH is used  
695 as a loading control. pSMAD2/GAPDH ratio is shown normalized to the unaffected  
696 control (WT).

697 (C) Gray-scale analysis results show significantly upregulated (pSMAD2) in  
698 constructs encoding truncating *FBNI* variants. EV denotes empty vector (pEGFP).

699 RT: room temperature. Data are represented as mean  $\pm$  SD of three independent  
700 experiments. \* denotes P value  $<0.05$  and \*\* denotes P value  $<0.01$ .



701

702 **Figure 4** The partial gene structure of the C-terminus of *FBNI* and overview of  
703 previously reported truncating variants in and around Exon 65 in patients presenting  
704 with MPLS

705 Blue, purple and red boxes denote specific domain. Light green, orange and black  
706 boxes denote exons and the gray area between the two boxes denote introns. All  
707 truncating variants were annotated by small green circles except that c.8226+1G>T  
708 previously reported twice was annotated by a big circle. COOH denotes COOH  
709 unique region. Deep blue box denotes purported asprosin encoded by the exons of  
710 *FBNI*.

711

712

713

714

**Figure 1**

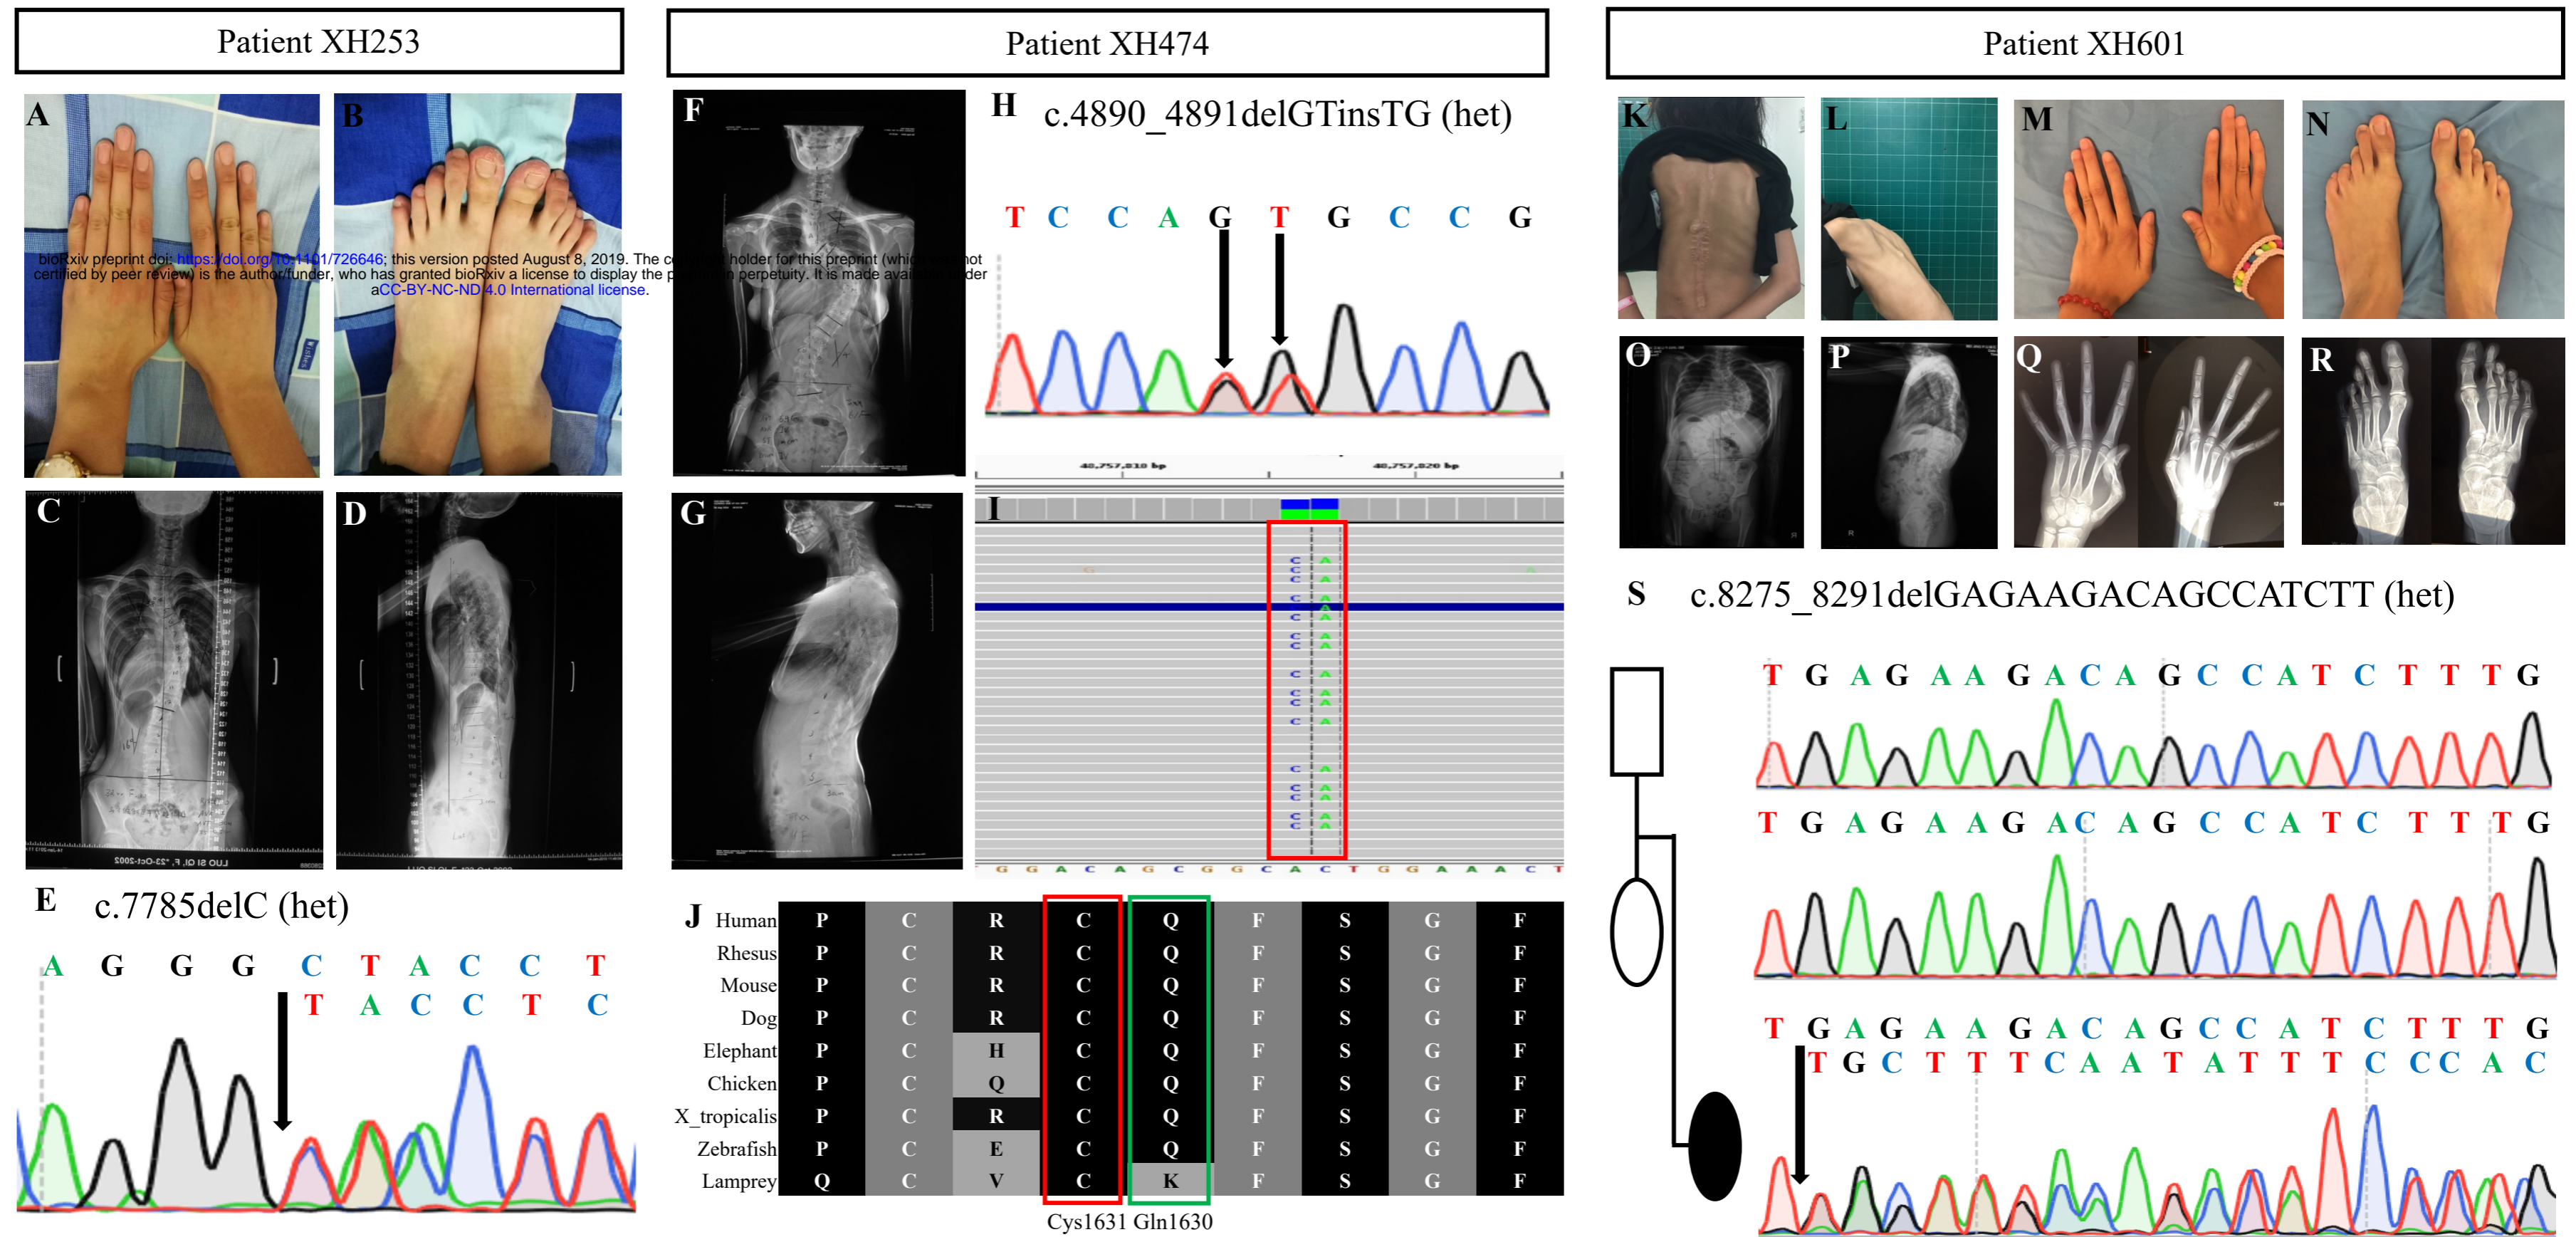

Figure 2

**A** FBN1-WT 

FBN1-Y2596Tfs\*86 

FBN1-E2759Cfs\*9 

bioRxiv preprint doi: <https://doi.org/10.1101/726646>; this version posted August 8, 2019. The copyright holder for this preprint (which was not certified by peer review) is the author/funder, who has granted bioRxiv a license to display the preprint in perpetuity. It is made available under aCC-BY-NC-ND 4.0 International license.

PTC  
2682

PTC  
2768

c.8175\_8182delACGGGGCA  
(p.Arg2726Glu fs\*9):  
Escaping NMD

c.8156\_8175delAA  
(p.Lys2719Thr fs\*12):  
Escaping NMD

c.8206\_8207insA  
(p.Thr2736Asn fs\*1):  
Escaping NMD

c.8155\_8156delAA  
(p.Lys2719Asp fs\*18):  
Escaping NMD

c.7785delC  
(p.Tyr2596Thr fs\*86):  
Triggering NMD

c.8275\_8291del  
(p.Glu2759Cys fs\*9):  
Escaping NMD

**B**

Information

-  Canonical stop
-  CDS start
-  Your variant location

Color

-  NMD-competent region
-  NMD-incompetent region
-  Nonstop region

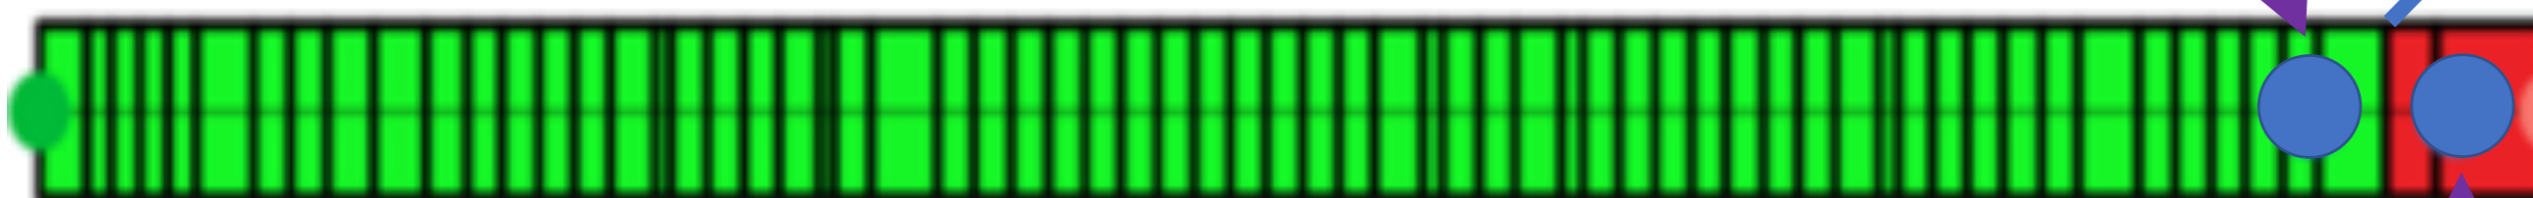

**Figure 3**

**A** Temperature RT

HEK293T

Anti-FBN1

bioRxiv preprint doi: <https://doi.org/10.1101/726646>; this version posted August 8, 2019. The copyright holder for this preprint (which was not certified by peer review) is the author/funder, who has granted bioRxiv a license to display the preprint in perpetuity. It is made available under aCC-BY-NC-ND 4.0 International license.

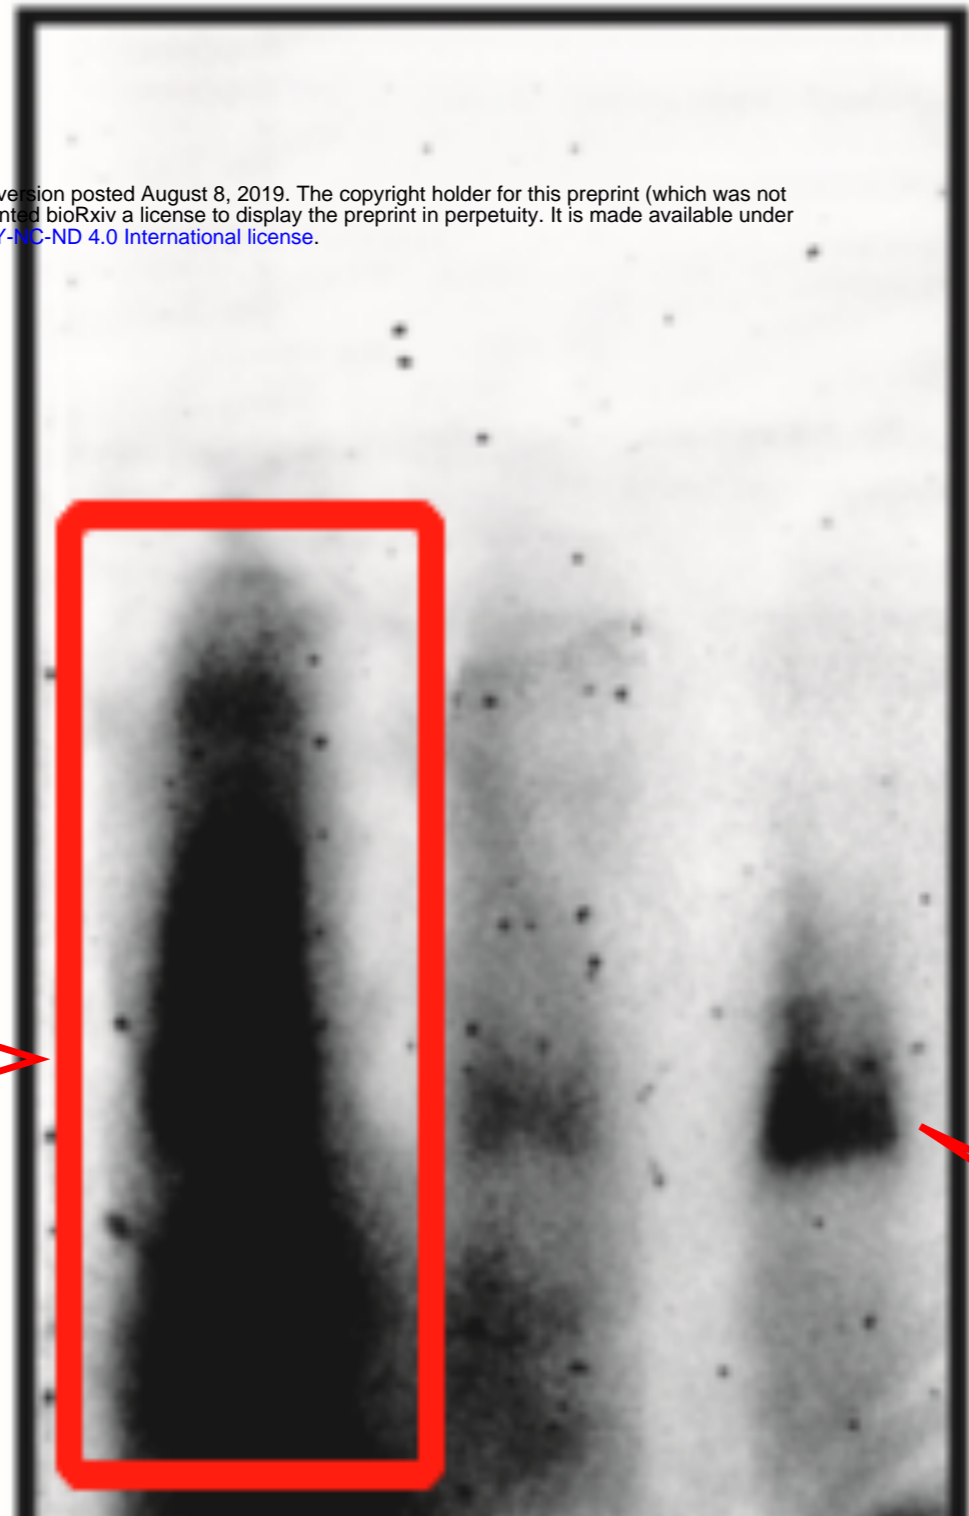

Aggregate

Monomer

|                  |   |   |   |
|------------------|---|---|---|
| FBN1-WT          | + | + | + |
| FBN1-Y2596Tfs*86 | - | + | - |
| FBN1-E2759Cfs*9  | - | - | + |

**B**

P-SMAD2

GAPDH

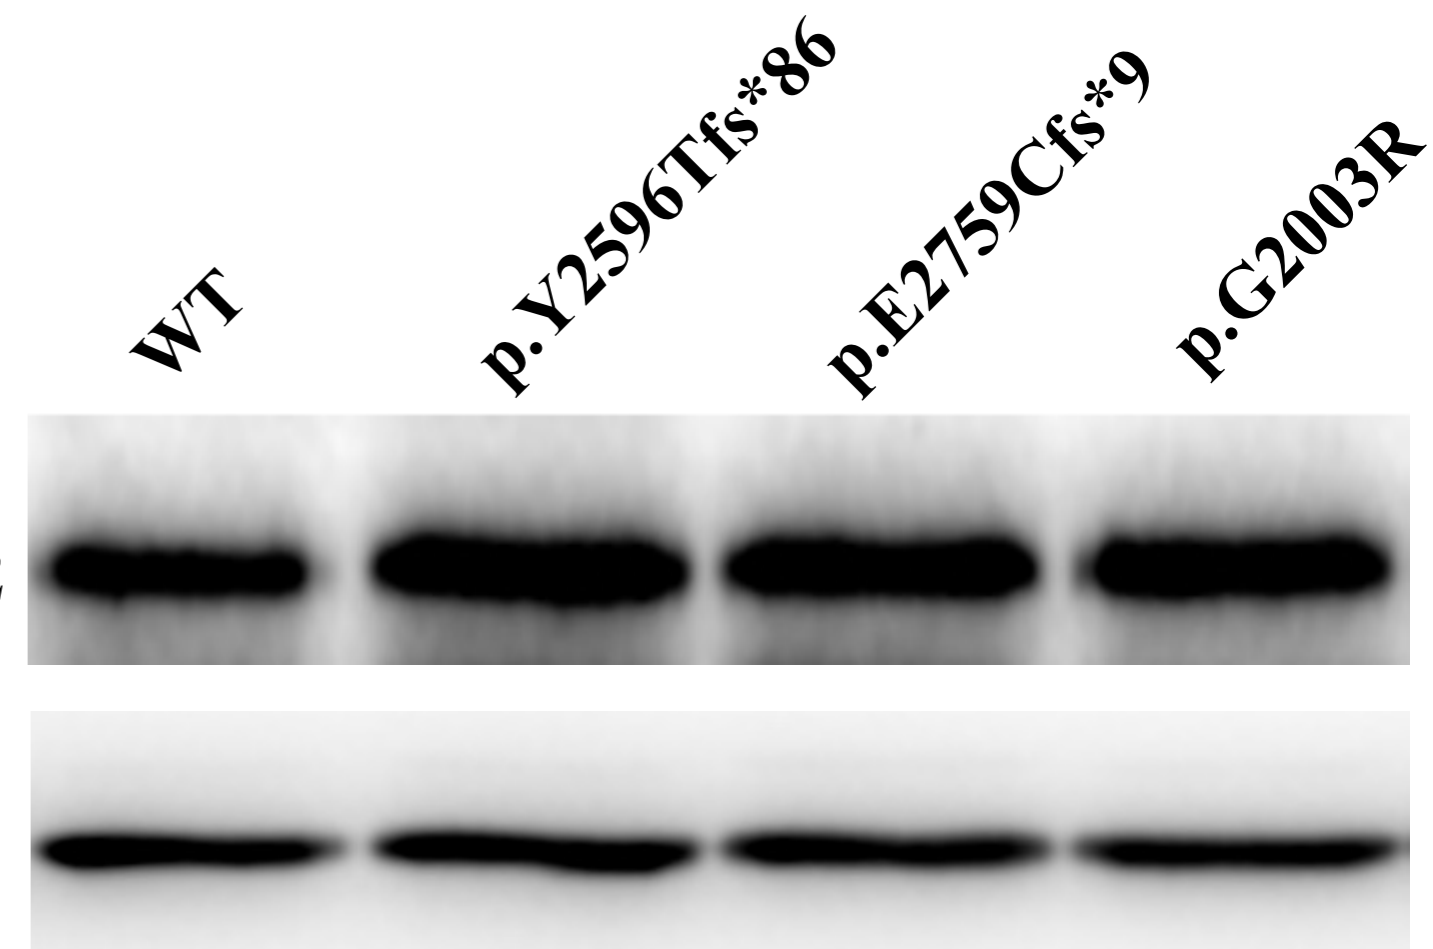

P-SMAD2/GAPDH

1.0

1.8

1.8

1.4

**C**

P-SMAD2/GAPDH

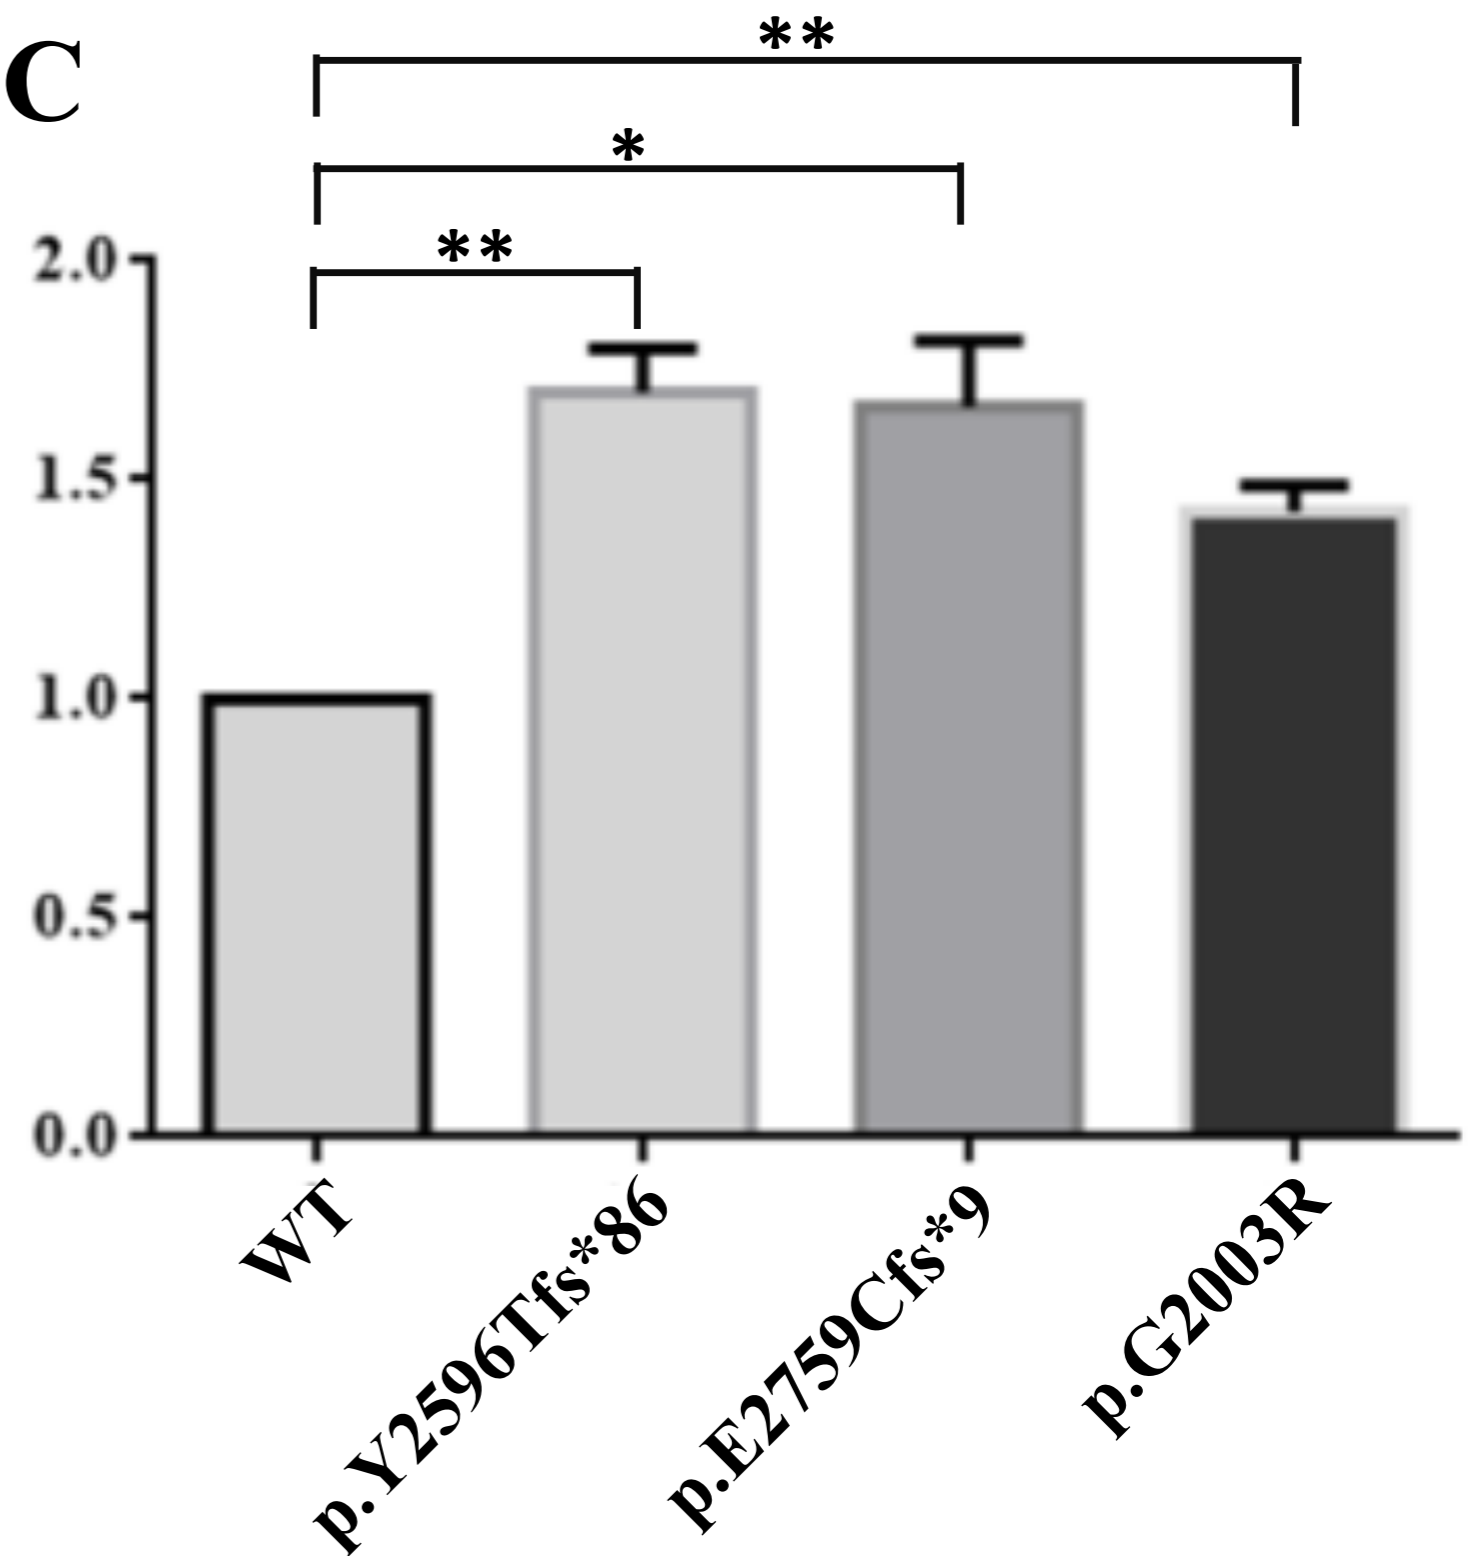

Figure 4

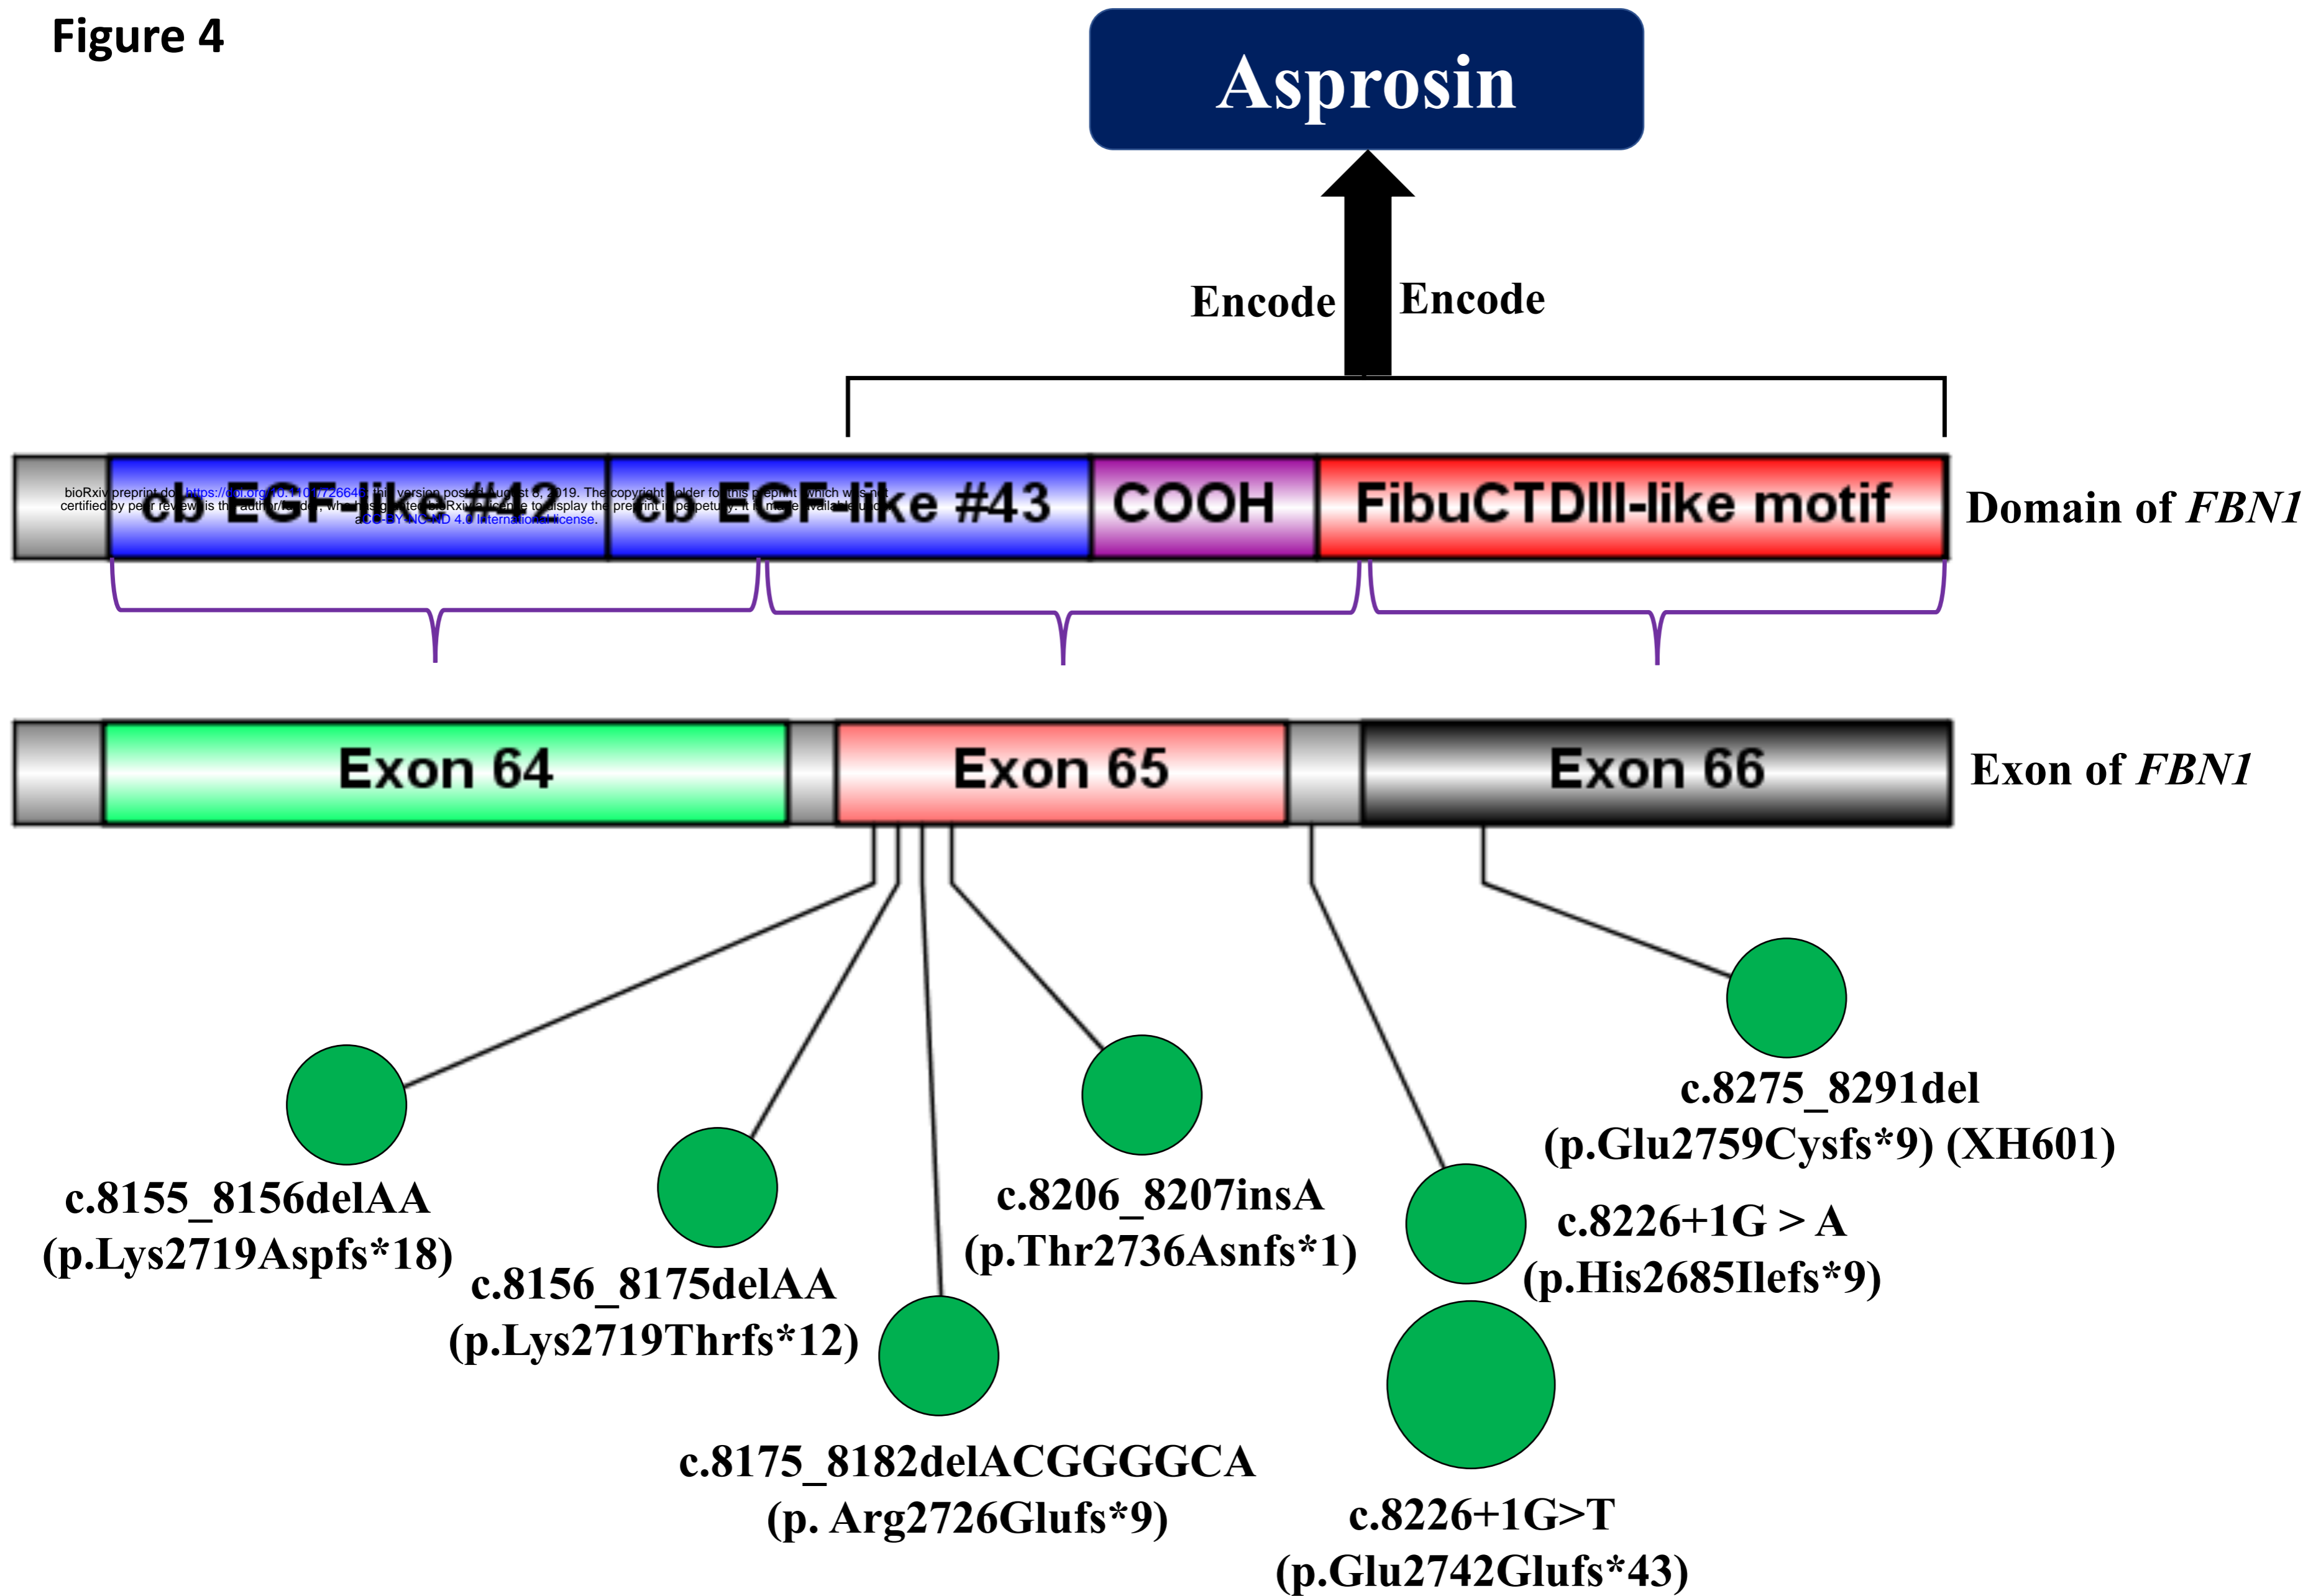

**Table 1** Clinical features of Marfan syndrome patients re-evaluated for according to the revised Ghent nosology

| Subject                             | XH253                       | XH474                         | XH601                           |
|-------------------------------------|-----------------------------|-------------------------------|---------------------------------|
| General patient information         |                             |                               |                                 |
| Gender                              | F                           | F                             | F                               |
| Age (years)                         | 10                          | 16                            | 9                               |
| Height (m)                          | 1.72                        | 1.71                          | 1.36                            |
| Weight (kg)                         | 48                          | 48                            | 20.5                            |
| Major Cobb angle (degrees)          | 43                          | 85                            | 117                             |
| Major Curve type                    | R-T                         | R-T                           | R-T                             |
| Curve number                        | 3                           | 3                             | 2                               |
| Curve details                       | UTC (38), MTC (43), LC (16) | UTC (60), MTC (85), LC (40)   | MTC (117), LC (89)              |
| Treatment                           | Surgery                     | Surgery                       | Surgery                         |
| Causal <i>FBNI</i> variant          |                             |                               |                                 |
| Nucleotide alteration               | c.7785delC                  | c.4890_4891delGTinsTG         | c.8275A8291delGAGAAGACAGCCATCTT |
| Protein change                      | p.Tyr2596Thrfs*86           | p.Gln1630_Cys1631delinsHisGly | p. Glu2759Cysfs*9               |
| Variant reported in MFS             | None                        | p. Cys1631Gly                 | None                            |
| MFS evaluation                      |                             |                               |                                 |
| Diagnosis                           | MFS                         | MASS                          | Marfanoid                       |
| Aortic root dilation (z-score)      | 4.5                         | 1.3                           | 1.6                             |
| Ectopia lentis                      | A                           | A                             | A                               |
| Systemic features score             | 7/20                        | 8/20                          | 7/20                            |
| Wrist/thumb sign                    | P                           | P                             | A                               |
| Pectus carinatum/ excavatum         | A                           | A                             | A                               |
| Hindfoot deformity                  | A                           | A                             | A                               |
| Pneumothorax                        | A                           | A                             | A                               |
| Dural ectasia                       | A                           | A                             | A                               |
| Protrusio acetabuli                 | A                           | A                             | A                               |
| UPer/lower segment                  | 0.92                        | 0.94                          | 0.86                            |
| Scoliosis or thoracolumbar kyphosis | P                           | P                             | P                               |
| Reduced elbow extension             | NA                          | NA                            | NA                              |
| Facial features (3/5)               | P                           | P                             | P                               |
| Skin striae                         | A                           | A                             | A                               |
| Myopia                              | -0.7 dioptries              | NA                            | -0.4 dioptries                  |
| Mitral valve prolapses (all types)  | P                           | P                             | P                               |

MFS denotes Marfan syndrome; MASS denotes myopia, mitral valve prolapses, borderline ( $Z < 2$ ) aortic root dilatation, striae, skeletal findings phenotype NA denotes not available; F denotes female; R-T denotes right thoracic spine; P denotes present; A denotes absent. UTC denotes upper thoracic curve; MTC denotes major thoracic curve; LC denotes lumbar curve.

**Table 2** Clinical manifestations of previously reported and our patient XH601 with Marfanoid-progeroid-lipodystrophy (MPL) syndrome with allelic truncating mutations in *FBNI*

|                                       | Graul-Neumann<br>et al. [2010] | Goldblatt<br>et al. [2011] | Horn and Robinson et<br>al. [2011]                   | Takenouchi<br>et al. [2013] | Jacquinet<br>et al. [2014]                                                           | Garg and Xing<br>et al. [2014] |                                                      | XH601<br>(this study)               |
|---------------------------------------|--------------------------------|----------------------------|------------------------------------------------------|-----------------------------|--------------------------------------------------------------------------------------|--------------------------------|------------------------------------------------------|-------------------------------------|
|                                       |                                |                            |                                                      |                             |                                                                                      | Patient 1                      | Patient 2                                            |                                     |
| Clinical characteristics              |                                |                            |                                                      |                             |                                                                                      |                                |                                                      |                                     |
| Age (year)                            | 27                             | 20                         | 3.5                                                  | 10                          | 16                                                                                   | 23                             | 17                                                   | 9                                   |
| Gender                                | Female                         | Male                       | Female                                               | Female                      | Female                                                                               | Female                         | Female                                               | Female                              |
| Ancestry                              | Caucasian                      | Caucasian                  | Caucasian                                            | Asian (Japanese)            | Caucasian                                                                            | Hispanic                       | Caucasian                                            | Asian (Chinese)                     |
| Height (cm; [centile])                | 170                            | 50-75                      | 108                                                  | 149                         | 177                                                                                  | 157.5                          | 176                                                  | 136                                 |
| Weight (Kg; [centile])                | 39                             | <3                         | 14.5                                                 | 21.7                        | 41.8                                                                                 | 26.4                           | 41.9                                                 | 20.5                                |
| Causal <i>FBNI</i> mutation           |                                |                            |                                                      |                             |                                                                                      |                                |                                                      |                                     |
| cDNA analysis                         | c.8155_8156delAA               | c.8156_8175del             | c.8226+1G>T,<br>splice mutation, exon<br>65 skipping | c.8175_8182del8bp           | c.8226+1G>A,<br>splice mutation,<br>exon 65 skipping<br>and subsequent<br>frameshift | c.8206_8027insA                | c.8226+1G>T,<br>splice mutation, exon<br>65 skipping | c.8275_8291del<br>GAGAAGACAGCCATCTT |
| protein change                        | p.(Lys2719Aspfs*18)            | p.(Lys2719Thrfs*12)        | p.(Glu2742Glufs*43)                                  | p.(Arg2726Glufs*9)          | p.(His2685Ilefs*9)                                                                   | p.(Thr2736Asnfs*1)             | p.(Glu2742Glufs*43)                                  | p.(Glu2759Cysfs*9)                  |
| Adjacent to Exon 65 in<br><i>FBNI</i> | Y                              | Y                          | Y                                                    | Y                           | Y                                                                                    | Y                              | Y                                                    | Y                                   |
| Inheritance pattern                   | <i>De novo</i>                 | <i>De novo</i>             | <i>De novo</i>                                       | <i>De novo</i>              | <i>De novo</i>                                                                       | <i>De novo</i>                 | <i>De novo</i>                                       | <i>De novo</i>                      |
| BMI (kg/m <sup>2</sup> )              | 13.3                           | NA                         | 12.4                                                 | 9.8                         | 13.3                                                                                 | 10.6                           | 13.5                                                 | 11.1                                |
| Body fat (%)                          | 20.5                           | NA                         | NA                                                   | NA                          | NA                                                                                   | 28.4                           | 27.7                                                 | NA                                  |
| Premature birth                       | Y                              | Y                          | Y                                                    | Y                           | Y                                                                                    | Y                              | Y                                                    | Y                                   |
| Birth weight (Kg)                     | 1.78                           | 1.04 (<3)                  | 1                                                    | 1.427                       | 1.72                                                                                 | 1.19                           | 1.17                                                 | NA                                  |
| Birth length (cm)                     | 41.5                           | NA                         | 40                                                   | 40                          | 45                                                                                   | 40                             | 40.75                                                | NA                                  |
| Progeroid appearance                  | Y                              | Y                          | Y                                                    | Y                           | Y                                                                                    | Y                              | Y                                                    | Y                                   |
| Subcutaneous fat<br>reduction         | Y                              | Y                          | Y                                                    | Y                           | Y                                                                                    | Y                              | Y                                                    | Y                                   |
| Arm span/height                       | 0.99                           | NA                         | NA                                                   | NA                          | NA                                                                                   | 0.94                           | 0.98                                                 | NA                                  |
| Upper/lower segment                   | 0.95                           | NA                         | NA                                                   | NA                          | NA                                                                                   | 0.99                           | 0.8                                                  | 0.87                                |
| Proptosis                             | Y                              | Y                          | Y                                                    | Y                           | Y                                                                                    | Y                              | Y                                                    | Y                                   |
| DPF                                   | NA                             | NA                         | NA                                                   | NA                          | NA                                                                                   | NA                             | NA                                                   | Y                                   |
| Myopia                                | Y                              | Y                          | N                                                    | Y                           | Severe                                                                               | Y                              | Y                                                    | Y                                   |
| Ectopia lentis                        | Bilateral                      | Bilateral                  | N                                                    | N                           | N                                                                                    | Left eye                       | N                                                    | N                                   |
| High-arched palate                    | Y                              | Y                          | Y                                                    | NA                          | NA                                                                                   | Y                              | N                                                    | NA                                  |
| Pectus excavatum                      | NA                             | Y                          | NA                                                   | Y                           | N                                                                                    | N                              | Y                                                    | N                                   |
| scoliosis / kyphosis                  | Kyphosis                       | NA                         | NA                                                   | NA                          | N                                                                                    | Scoliosis                      | Scoliosis                                            | Severe scoliosis                    |
| Cobb angle (degrees)                  | NA                             | NA                         | NA                                                   | NA                          | NA                                                                                   | NA                             | NA                                                   | 117                                 |
| Wrist sign                            | Y                              | Y                          | NA                                                   | NA                          | NA                                                                                   | Y                              | Y                                                    | Y                                   |
| Thumb sign                            | Y                              | N                          | NA                                                   | NA                          | NA                                                                                   | Y                              | Y                                                    | Y                                   |
| BMJD                                  | NA                             | NA                         | NA                                                   | NA                          | NA                                                                                   | NA                             | NA                                                   | Y                                   |
| Interosseous atrophy                  | NA                             | NA                         | NA                                                   | NA                          | NA                                                                                   | NA                             | NA                                                   | Y                                   |
| Arachnodactyly                        | NA                             | NA                         | NA                                                   | Y                           | Y                                                                                    | NA                             | NA                                                   | Y                                   |
| Hyperextensible digits                | NA                             | Y                          | NA                                                   | Y                           | Y                                                                                    | Y                              | Y                                                    | Y                                   |
| Pes planus /valgus                    | NA                             | Pes planus                 | NA                                                   | NA                          | Pes valgus                                                                           | NA                             | Pes planus                                           | NA                                  |
| Easy bruisability                     | Y                              | Y                          | NA                                                   | NA                          | NA                                                                                   | N                              | N                                                    | Y                                   |
| MVPS                                  | Y                              | N                          | N                                                    | N                           | N                                                                                    | NA                             | Y                                                    | Y                                   |
| Arrested<br>hydrocephalus             | NA                             | Y                          | Y                                                    | Y                           | NA                                                                                   | NA                             | NA                                                   | NA                                  |
| RGC                                   | NA                             | NA                         | NA                                                   | Hydronephrosis              | N                                                                                    | NA                             | NA                                                   | N                                   |
| Dural ectasia                         | Lumbosacral                    | NA                         | NA                                                   | Y                           | Y                                                                                    | NA                             | NA                                                   | N                                   |
| Hypertension                          | NA                             | NA                         | NA                                                   | Y                           | NA                                                                                   | NA                             | NA                                                   | N                                   |
| CHD                                   | NA                             | NA                         | NA                                                   | NA                          | NA                                                                                   | NA                             | NA                                                   | Y                                   |

Abbreviations: Y, yes; N, no; NA, not available. DPF, downslanting palpebral fissures; BMJD: bilateral metacarpophalangeal joint dislocation; MVPS, mitral valve prolapse syndrome; RGC, renal/genitourinary complications. CHD, congenital hip dislocation
